# Supplementary material
Source: PubMed Central journal article supplement (PMC6073071)
Supplement: EMBR-19-e46182-s002.pdf [file EMBR-19-e46182-s002.pdf]

## Expanded View Figures

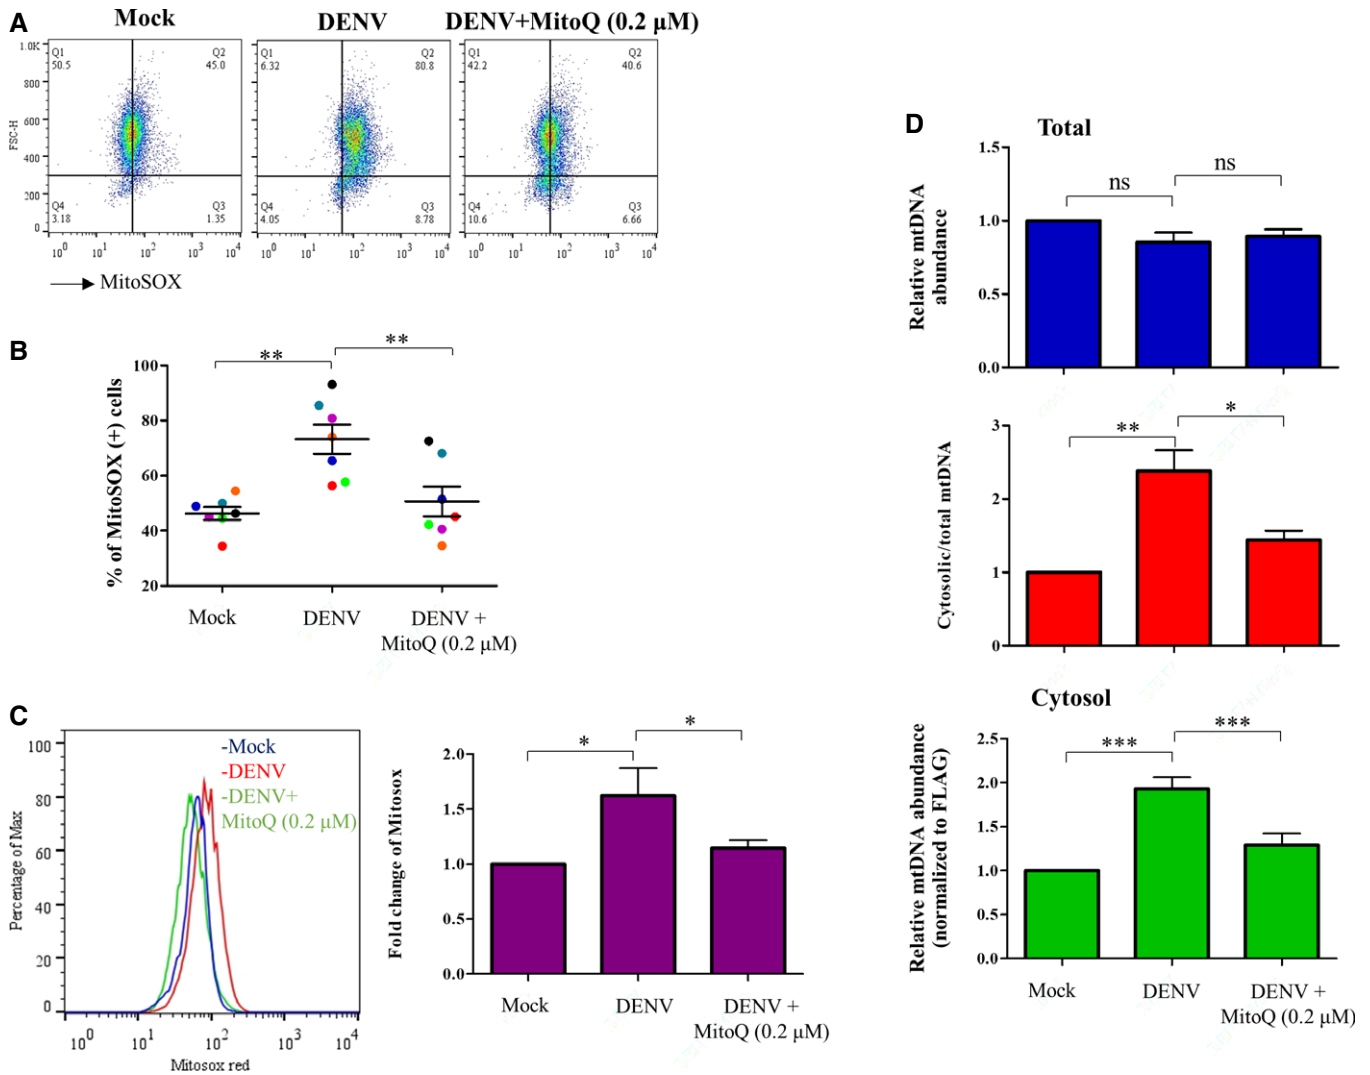

**Figure EV1. Effects of a mitochondria-targeted antioxidant MitoQ in DENV-induced mtDNA release.**

A–D Human DCs were infected with mock or DENV (MOI = 5) in the absence or presence of a mitochondria-targeted antioxidant MitoQ (0.2 μM). The intensity of MitoSOX fluorescence (A,  $n = 7$ ), the percentages of MitoSOX-positive cells (B,  $n = 7$ ), the percentages of Max (C,  $n = 7$ ), and the relative abundance of mtDNA (D,  $n = 7$ ) were determined. Values are means of individual measurements in each sample  $\pm$  SEM. \* $P < 0.05$ , \*\* $P < 0.01$ , and \*\*\* $P < 0.001$  (paired, two-tailed Student's  $t$ -test).

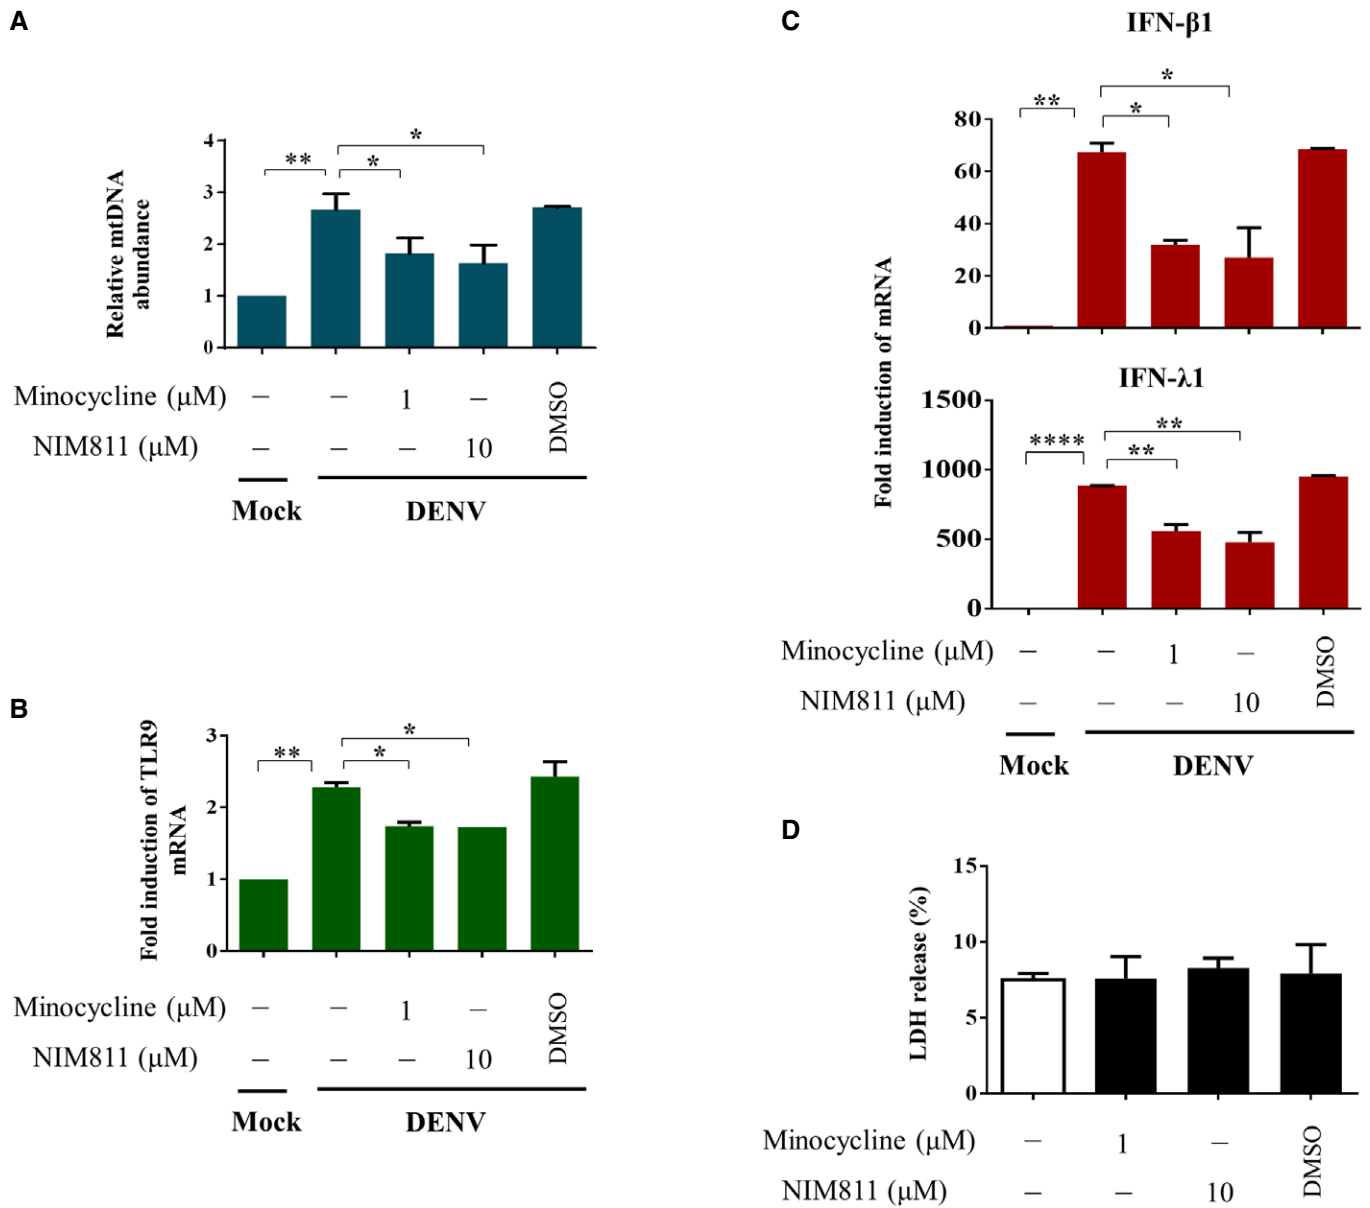

**Figure EV2. Effects of minocycline and NIM811 on DENV-induced mtDNA release, TLR9 mRNA expression, and IFN mRNA expression.**

A–D Human DCs ( $2 \times 10^4$ ) were infected with mock or DENV (MOI = 5) for 24 h in the absence or presence of minocycline (1 μM), NIM811 (10 μM) or DMSO. The relative abundance of mtDNA was measured using the exogenously added FLAG gene as a control for normalization (A,  $n = 2$ ). The expression of TLR9 mRNA (B,  $n = 2$ ), IFN-β1 and IFN-λ1 mRNA (C,  $n = 2$ ), and LDH release (D,  $n = 2$ ) were measured accordingly. Values are means of individual measurements in each sample ± SEM. \* $P < 0.05$ , \*\* $P < 0.01$ , and \*\*\*\* $P < 0.0001$  (one-way ANOVA multiple comparisons with Bonferroni *post hoc* test).

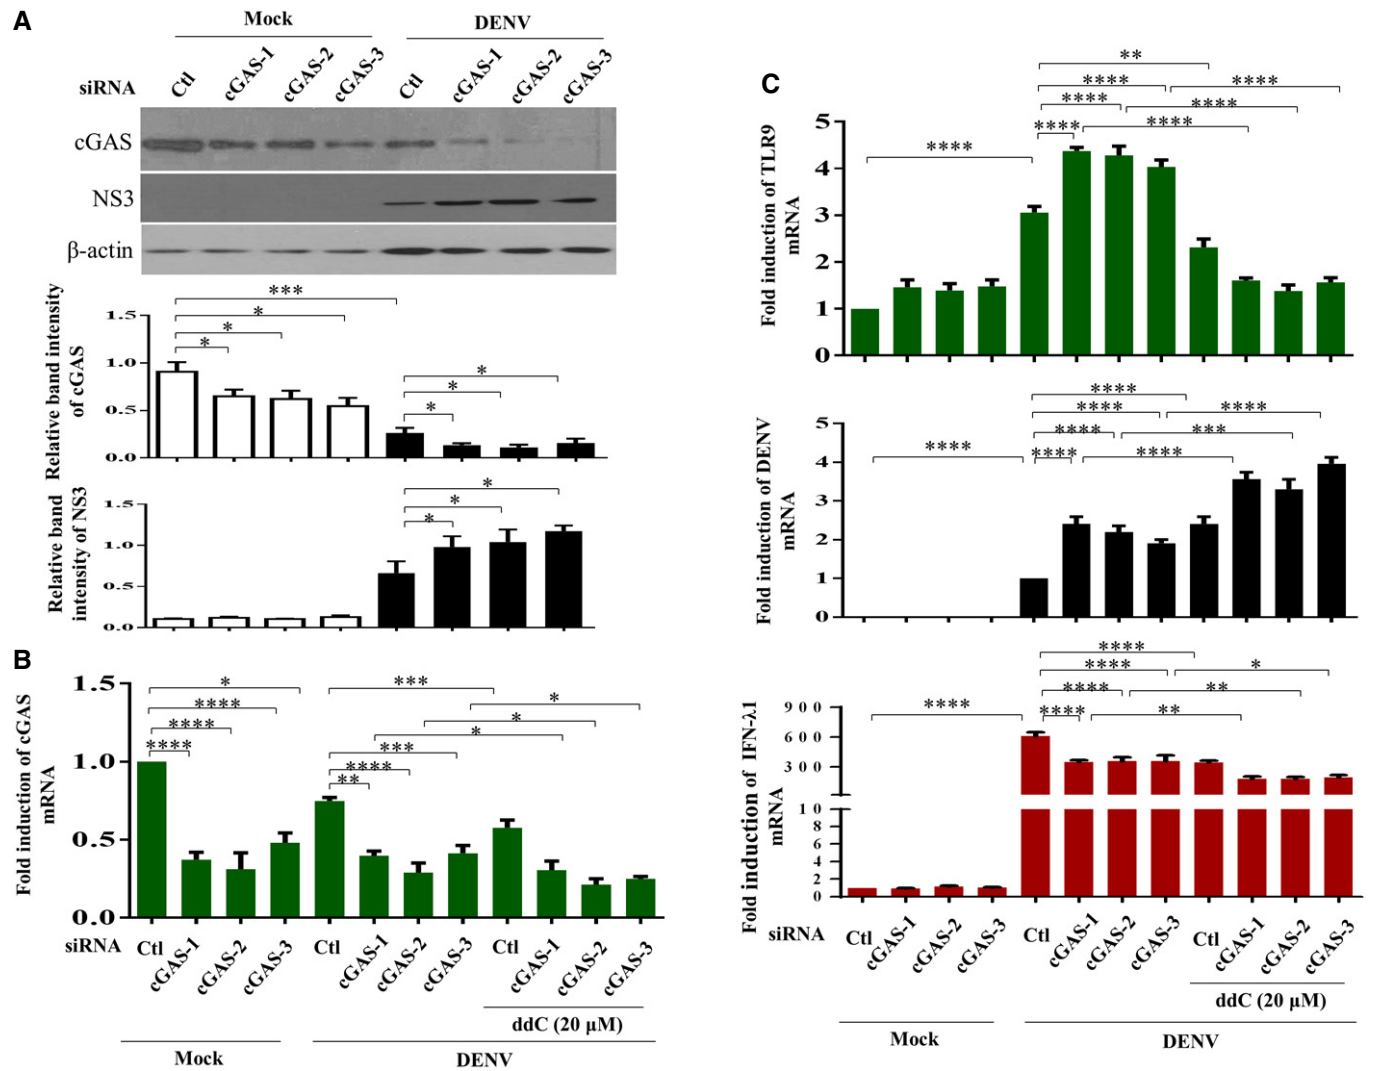

**Figure EV3. Effects of cGAS knockdown with or without concomitant mtDNA depletion in DENV-infected DCs.**

A–C Human DCs were transfected with control siRNA (Ctl) or three sets of cGAS siRNA duplexes for 24 h and then infected with mock or DENV (MOI = 5) for an additional 24 h. As indicated, ddC treatment to deplete mtDNA was introduced in some conditions. The cGAS, viral NS3 and β-actin protein levels (A,  $n = 4$ ), cGAS mRNA (B,  $n = 4$ ) and TLR9 mRNA, DENV mRNA, and IFN-λ1 mRNA (C,  $n = 4$ ) were determined. Values are means of individual measurements in each sample  $\pm$  SEM. \* $P < 0.05$ , \*\* $P < 0.01$ , \*\*\* $P < 0.001$ , and \*\*\*\* $P < 0.0001$  (one-way ANOVA multiple comparisons with Bonferroni *post hoc* test).

Source data are available online for this figure.

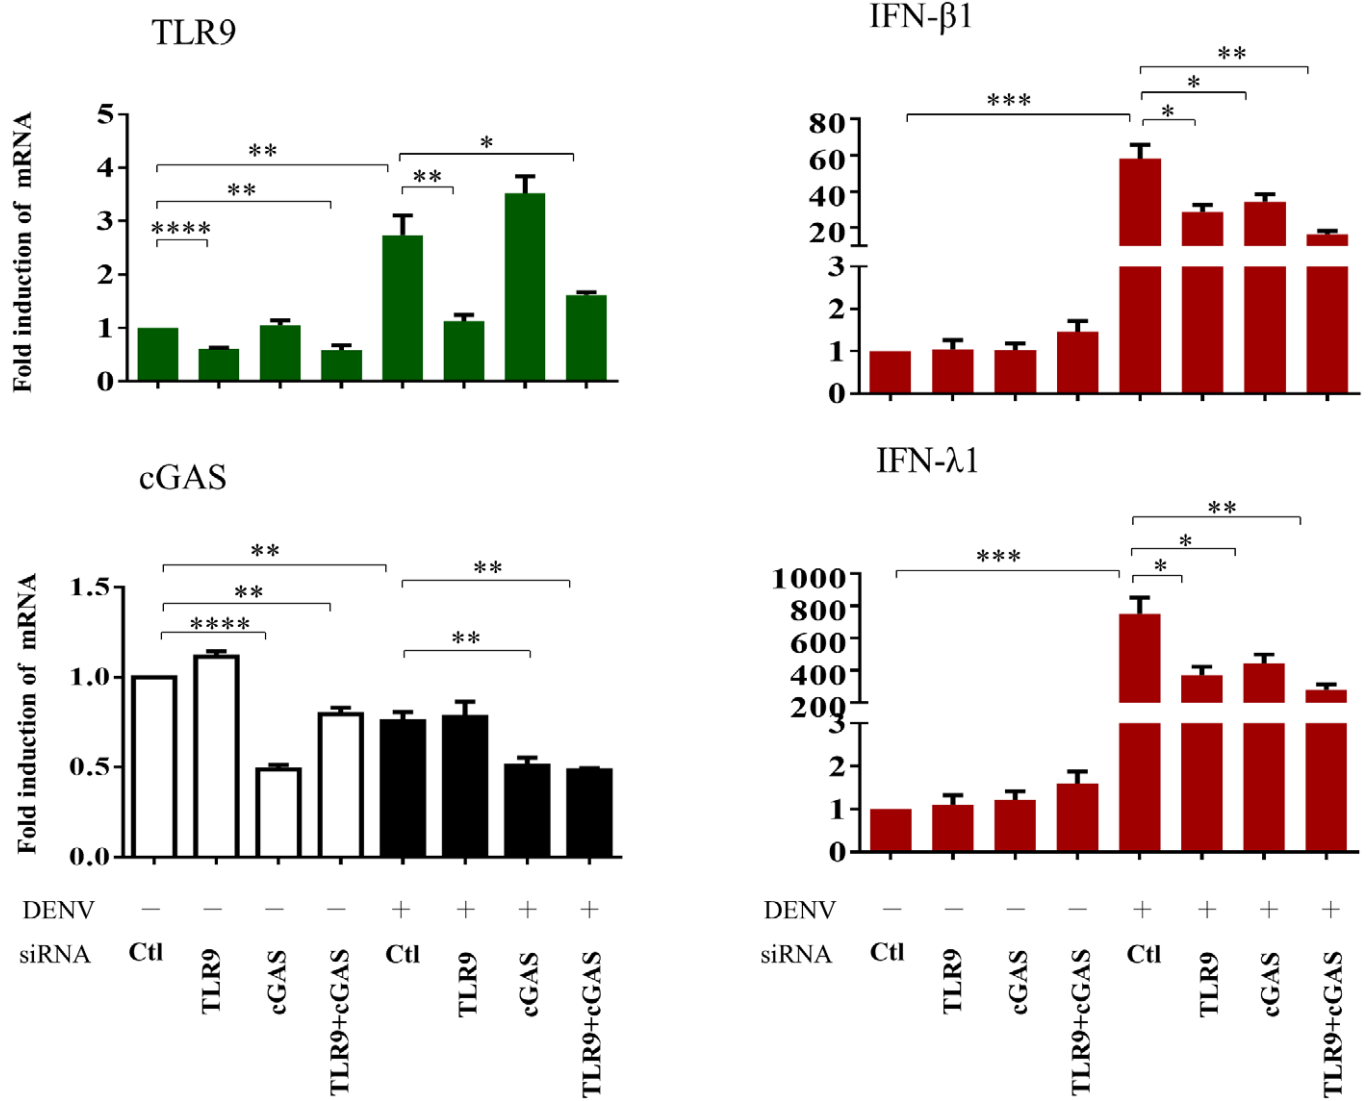

**Figure EV4. Side-by-side comparisons of the effects of TLR9 and cGAS knockdown in DENV-induced IFN mRNA expression.**

Human DCs were transfected with control siRNA (Ctl), TLR9 siRNA, cGAS siRNA, or both TLR9 and cGAS siRNA duplexes for 24 h and then infected with mock or DENV (MOI = 5) for an additional 24 h. The mRNA levels of TLR9, cGAS, IFN-β1, and IFN-λ1 were determined (*n* = 4). Values are means of individual measurements in each sample ± SEM. \**P* < 0.05, \*\**P* < 0.01, \*\*\**P* < 0.001, and \*\*\*\**P* < 0.0001 (unpaired, two-tailed Student's *t*-test).
