# Supplementary material
Source: PubMed Central journal article supplement (PMC6073071)
Supplement: EMBR-19-e46182-s003.pdf [file EMBR-19-e46182-s003.pdf]

**A**

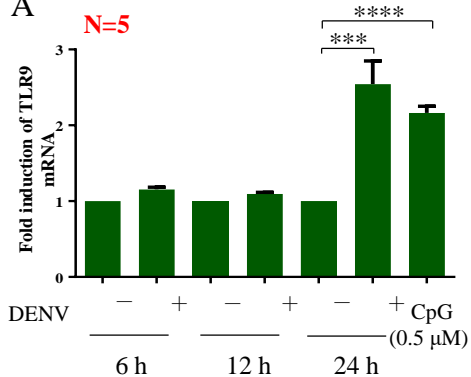

| TLR9 RNA experiment | 6 hr |          | 12 hr |          | 24 hr |          | CpG         |
|---------------------|------|----------|-------|----------|-------|----------|-------------|
|                     | mock | DENV     | mock  | DENV     | mock  | DENV     |             |
| 1                   | 1.   | 1.201636 | 1.    | 1.113422 | 1.    | 2.013911 | 2.077718    |
| 2                   | 1.   | 1.082975 | 1.    | 1.117287 | 1.    | 1.664397 | 2.070530    |
| 3                   | 1.   | 1.205808 | 1.    | 1.024557 | 1.    | 2.857988 | 2.020903    |
| 4                   | 1.   | 1.201636 | 1.    | 1.113422 | 1.    | 2.848100 | 2.143547    |
| 5                   | 1.   | 1.082975 | 1.    | 1.117287 | 1.    | 3.328795 | 2.505329    |
| AVG.                | 1    | 1.155006 | 1     | 1.097195 | 1     | 2.542638 | 2.1636054   |
| SEM                 | 0    | 0.029416 | 0     | 0.01818  | 0     | 0.305095 | 0.087630191 |
| Student's T test    |      |          |       |          |       | 0.0010   | < 0.0001    |
| p value (v.s. mock) |      |          |       |          |       |          |             |

**B**

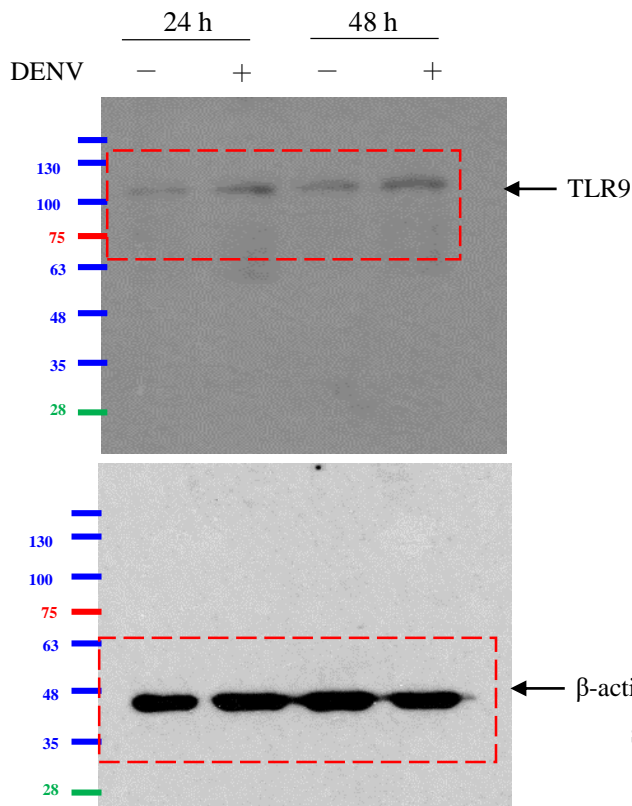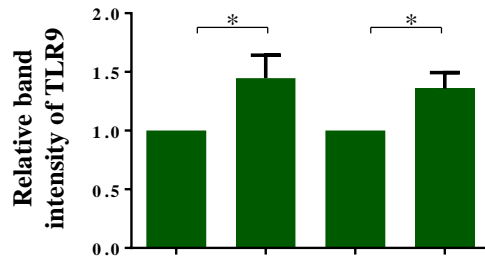

| TLR9 western blot experiment | 24 hr |          | 48 hr |          |
|------------------------------|-------|----------|-------|----------|
|                              | mock  | DENV     | mock  | DENV     |
| 1                            | 1.    | 1.162495 | 1.    | 1.156429 |
| 2                            | 1.    | 0.982794 | 1.    | 1.202340 |
| 3                            | 1.    | 1.642353 | 1.    | 2.018348 |
| 4                            | 1.    | 1.056870 | 1.    | 1.245430 |
| 5                            | 1.    | 2.510905 | 1.    | 0.785699 |
| 6                            | 1.    | 0.996724 | 1.    | 1.424089 |
| 7                            | 1.    | 1.262923 | 1.    | 1.240313 |
| 8                            | 1.    | 1.966083 | 1.    | 1.788079 |
| AVG.                         | 1     | 1.447643 | 1     | 1.357591 |
| SEM                          | 0     | 0.194788 | 0     | 0.136559 |
| Student's T test             |       | 0.0375   |       | 0.0202   |
| p value (v.s. mock)          |       |          |       |          |

**C**

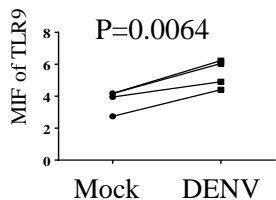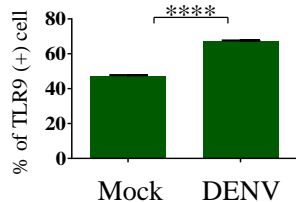

| TLR9 MIF experiment     | 24 hr    |          | TLR9 (+) % experiment | 24 hr    |             |
|-------------------------|----------|----------|-----------------------|----------|-------------|
|                         | mock     | DENV     |                       | mock     | DENV        |
| 1                       | 4.18     | 6.23     | 1                     | 47.2     | 67.9        |
| 2                       | 2.74     | 4.41     | 2                     | 46.2     | 66.02       |
| 3                       | 3.95     | 4.91     | 3                     | 48.98    | 68.05       |
| 4                       | 4.17     | 6.05     | 4                     | 45.64    | 66.62       |
| AVG.                    | 3.76     | 5.4      | AVG.                  | 47.005   | 67.1475     |
| SEM                     | 0.344117 | 0.440795 | SEM                   | 0.733138 | 0.494155424 |
| paired Student's T test |          | 0.0064   | Student's T test      |          | < 0.0001    |
| p value (v.s. mock)     |          |          | p value (v.s. mock)   |          |             |

D

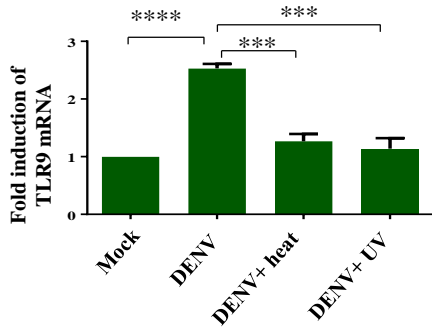

TLR9 mRNA

| experiment          | 24 hr |             |            |             |
|---------------------|-------|-------------|------------|-------------|
|                     | mock  | DENV        | DENV+ Heat | DENV +UV    |
| 1                   | 1     | 2.394957    | 1.45902    | 1.176907    |
| 2                   | 1     | 2.751084    | 1.479388   | 1.235419    |
| 3                   | 1     | 2.52        | 1.18       | 1.51        |
| 4                   | 1     | 2.46        | 0.95       | 0.63        |
| AVG.                | 1     | 2.53151025  | 1.267102   | 1.1380815   |
| SEM                 | 0     | 0.077516462 | 0.125843   | 0.184267059 |
| Student's T test    |       | < 0.0001    | 0.0001     | 0.0004      |
| p value (v.s. DENV) |       |             |            |             |

E

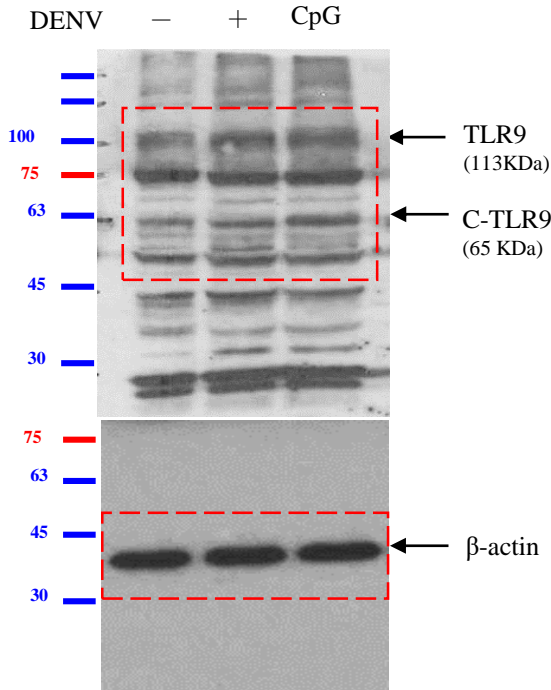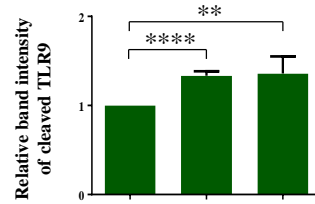

TLR9 western blot

| experiment          | 24 hr |             |          |
|---------------------|-------|-------------|----------|
|                     | mock  | DENV        | CpG      |
| 1                   | 1     | 1.359192    |          |
| 2                   | 1     | 1.353546    |          |
| 3                   | 1     | 1.248903    |          |
| 4                   | 1     | 1.540517    |          |
| 5                   | 1     | 1.17527     | 1.166828 |
| 6                   | 1     | 1.324129    | 1.551494 |
| AVG.                | 1     | 1.333592833 | 1.359161 |
| SEM                 | 0     | 0.050398118 | 0.192333 |
| Student's T test    |       | < 0.0001    | 0.0074   |
| p value (v.s. mock) |       |             |          |

F

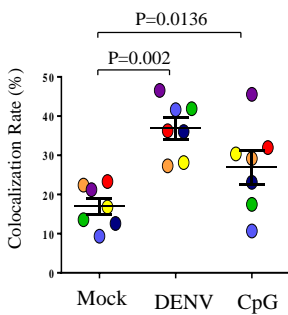

TLR9 confocal

| experiment          | 24 hr    |             |          |
|---------------------|----------|-------------|----------|
|                     | mock     | DENV        | CpG      |
| 1                   | 23.32    | 36.26       | 31.98    |
| 2                   | 22.39    | 27.33       | 29.18    |
| 3                   | 16.81    | 28.14       | 30.35    |
| 4                   | 13.57    | 41.9        | 17.47    |
| 5                   | 9.37     | 41.66       | 10.7     |
| 6                   | 12.6     | 36.07       | 23.09    |
| 7                   | 21.22    | 46.56       | 45.58    |
| AVG.                | 17.04    | 36.84571429 | 26.90714 |
| SEM                 | 2.048051 | 2.718427291 | 4.247493 |
| Student's T test    |          | 0.0020      | 0.0136   |
| p value (v.s. mock) |          |             |          |
