# Supplementary material
Source: PubMed Central journal article supplement (PMC6073071)
Supplement: EMBR-19-e46182-s004.pdf [file EMBR-19-e46182-s004.pdf]

**A**

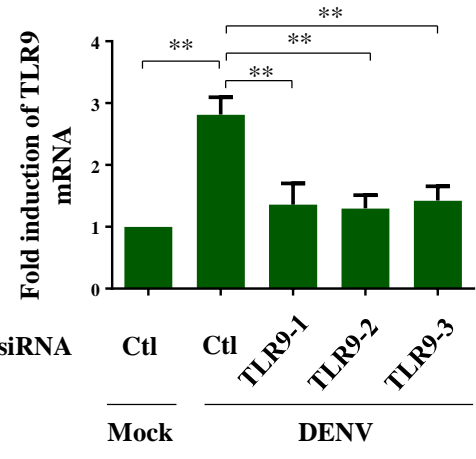

| TLR9 mRNA                 |            | 24 hr       |               |               |               |  |
|---------------------------|------------|-------------|---------------|---------------|---------------|--|
| experiment                | mock siCtl | DENV siCtl  | DENV siTLR9-1 | DENV siTLR9-2 | DENV siTLR9-3 |  |
| 1                         | 1          | 3.317364    | 1.101932      | 0.942808      | 1.419161      |  |
| 2                         | 1          | 2.34567     | 0.939523      | 1.270152      | 1.024556      |  |
| 3                         | 1          | 2.779836    | 2.03496       | 1.681793      | 1.827662      |  |
| AVG.                      | 1          | 2.81429     | 1.358805      | 1.298251      | 1.423793      |  |
| SEM                       | 0          | 0.281032392 | 0.341313      | 0.213788738   | 0.231848      |  |
| One way ANOVA (v.s. DENV) | p value    | 0.0014      | 0.0069        | 0.0052        | 0.0093        |  |

**B**

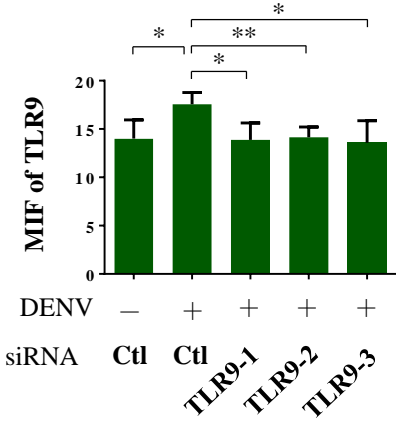

| TLR9 MIF                  |            | 24 hr       |               |               |               |  |
|---------------------------|------------|-------------|---------------|---------------|---------------|--|
| experiment                | mock siCtl | DENV siCtl  | DENV siTLR9-1 | DENV siTLR9-2 | DENV siTLR9-3 |  |
| 1                         | 16.47      | 18.46       | 14.2          | 15.53         | 15.39         |  |
| 2                         | 13.25      | 17.31       | 15.53         | 14            | 14.68         |  |
| 3                         | 11.94      | 18.54       | 14.34         | 14.1          | 13.98         |  |
| 4                         | 14.4       | 15.95       | 11.4          | 12.95         | 10.25         |  |
| AVG.                      | 14.015     | 17.565      | 13.8675       | 14.145        | 13.575        |  |
| SEM                       | 0.960299   | 0.607241028 | 0.874942      | 0.529882062   | 1.145095      |  |
| One way ANOVA (v.s. DENV) | p value    | 0.0492      | 0.021         | 0.0046        | 0.0217        |  |

**C**

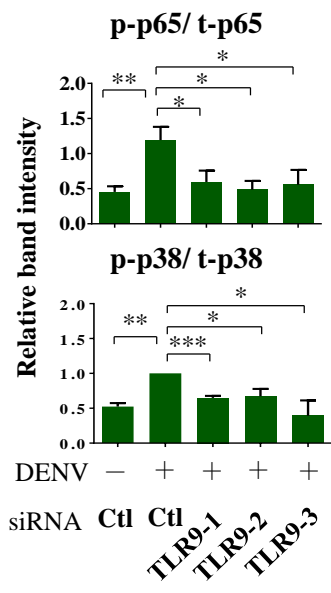

| p-p65/t-p65               |            | 24 hr       |               |               |               |  |
|---------------------------|------------|-------------|---------------|---------------|---------------|--|
| experiment                | mock siCtl | DENV siCtl  | DENV siTLR9-1 | DENV siTLR9-2 | DENV siTLR9-3 |  |
| 1                         | 0.520709   | 1.199068    | 1.036946      | 0.604431      | 0.197634      |  |
| 2                         | 0.56719    | 1.042421    | 0.552322      | 0.486274667   | 0.5553243     |  |
| 3                         | 0.158509   | 0.809128    | 0.292249      | 0.617949      | 0.91369       |  |
| 4                         | 0.597283   | 1.015746    | 0.886759      | 0.462746667   | 0.93098       |  |
| 5                         | 0.428702   | 1.899309    | 0.212668      | 0.236444      | 0.178993      |  |
| AVG.                      | 0.454479   | 1.1931344   | 0.596189      | 0.481569067   | 0.555324      |  |
| SEM                       | 0.079292   | 0.187130952 | 0.161259      | 0.068613871   | 0.164181      |  |
| One way ANOVA (v.s. DENV) | p value    | 0.0064      | 0.031         | 0.0193        | 0.0414        |  |

| p-p38/t-p38               |            | 24 hr      |               |               |               |  |
|---------------------------|------------|------------|---------------|---------------|---------------|--|
| experiment                | mock siCtl | DENV siCtl | DENV siTLR9-1 | DENV siTLR9-2 | DENV siTLR9-3 |  |
| 1                         | 0.460172   | 1          | 0.664783      | 0.463787      | 0.274548      |  |
| 2                         | 0.62185    | 1          | 0.689761      | 0.804121      | 0.086606      |  |
| 3                         | 0.492569   | 1          | 0.59512       | 0.748088      | 0.818546      |  |
| AVG.                      | 0.524864   | 1          | 0.649888      | 0.671998667   | 0.393233      |  |
| SEM                       | 0.049387   | 0          | 0.028317      | 0.105354952   | 0.219468      |  |
| One way ANOVA (v.s. DENV) | p value    | 0.0049     | 0.0006        | 0.0272        | 0.0327        |  |

C

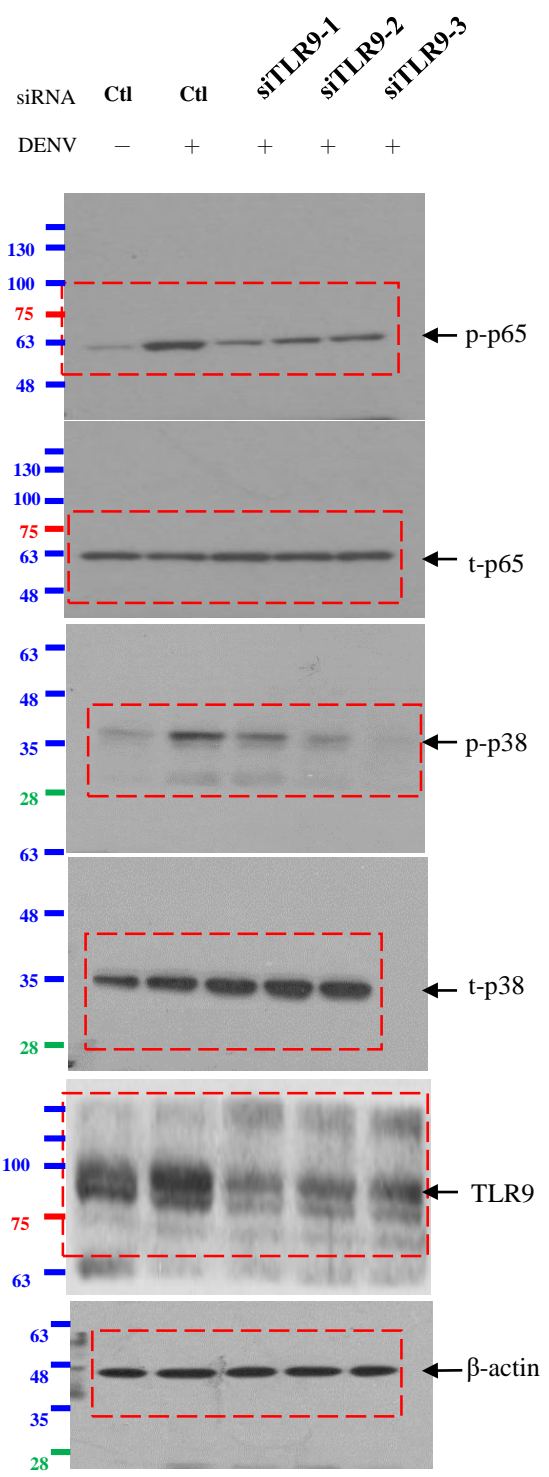

D

Fold induction of mRNA

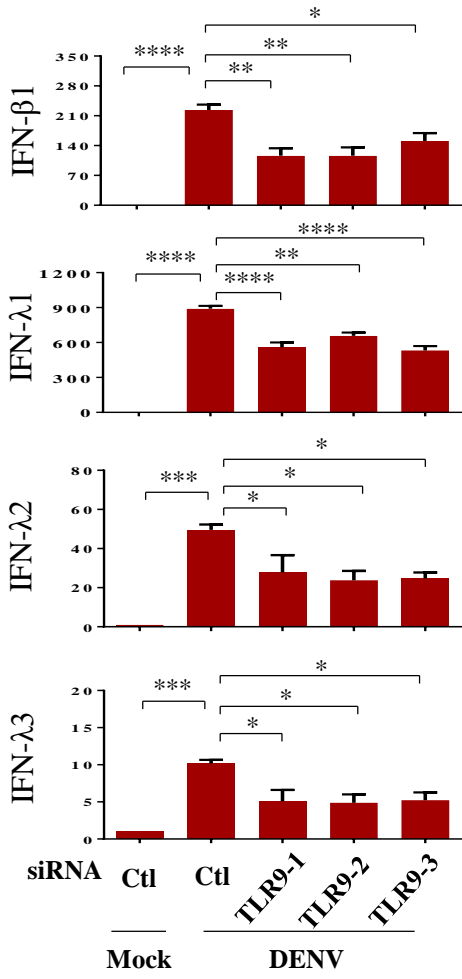

**IFN-β1 mRNA**

|                                  |            | 24 hr       |               |               |               |  |
|----------------------------------|------------|-------------|---------------|---------------|---------------|--|
| experiment                       | mock siCtl | DENV siCtl  | DENV siTLR9-1 | DENV siTLR9-2 | DENV siTLR9-3 |  |
| 1                                | 1          | 207.9434    | 84.15908      | 82.42712      | 141.0485      |  |
| 2                                | 1          | 214.5232    | 119.4274      | 150.1218      | 125.8001      |  |
| 3                                | 1          | 248.4704    | 144.7009      | 116.3179      | 186.3575      |  |
| <b>AVG.</b>                      | 1          | 223.6456667 | 116.0958      | 116.28894     | 151.0687      |  |
| <b>SEM</b>                       | 0          | 12.5568571  | 17.55613      | 19.54177623   | 18.18519      |  |
| <b>One way ANOVA (v.s. DENV)</b> |            | < 0.0001    | 0.0023        | 0.0023        | 0.0298        |  |

**IFN-λ1 mRNA**

|                                  |            | 24 hr       |               |               |               |  |
|----------------------------------|------------|-------------|---------------|---------------|---------------|--|
| experiment                       | mock siCtl | DENV siCtl  | DENV siTLR9-1 | DENV siTLR9-2 | DENV siTLR9-3 |  |
| 1                                | 1          | 926.0846    | 480.7398      | 657.1144      | 544.9572      |  |
| 2                                | 1          | 900.7605    | 561.5098      | 706.7223      | 590.1756      |  |
| 3                                | 1          | 843.3353    | 630.3299      | 608.8586      | 458.2406      |  |
| <b>AVG.</b>                      | 1          | 890.0601333 | 557.5265      | 657.5651      | 531.1245      |  |
| <b>SEM</b>                       | 0          | 24.47948153 | 43.22885      | 28.25171554   | 38.70926      |  |
| <b>One way ANOVA (v.s. DENV)</b> |            | < 0.0001    | < 0.0001      | 0.0013        | < 0.0001      |  |

**IFN-λ2 mRNA**

|                                  |            | 24 hr       |               |               |               |  |
|----------------------------------|------------|-------------|---------------|---------------|---------------|--|
| experiment                       | mock siCtl | DENV siCtl  | DENV siTLR9-1 | DENV siTLR9-2 | DENV siTLR9-3 |  |
| 1                                | 1          | 54.56728    | 43.41024      | 21.40631      | 28.44227      |  |
| 2                                | 1          | 45.09718    | 12.64038      | 33.01308      | 27.0952       |  |
| 3                                | 1          | 48.99057    | 27.27359      | 16.78887      | 18.24502      |  |
| <b>AVG.</b>                      | 1          | 49.55167667 | 27.77474      | 23.73608667   | 24.59416      |  |
| <b>SEM</b>                       | 0          | 2.748140524 | 8.886027      | 4.826218051   | 3.1983        |  |
| <b>One way ANOVA (v.s. DENV)</b> |            | 0.0001      | 0.0418        | 0.0158        | 0.0193        |  |

**IFN-λ3 mRNA**

|                                  |            | 24 hr      |               |               |               |  |
|----------------------------------|------------|------------|---------------|---------------|---------------|--|
| experiment                       | mock siCtl | DENV siCtl | DENV siTLR9-1 | DENV siTLR9-2 | DENV siTLR9-3 |  |
| 1                                | 1          | 9.952091   | 3.305796      | 2.828424      | 4.257484      |  |
| 2                                | 1          | 9.382681   | 3.758092      | 5.080609      | 4.098224      |  |
| 3                                | 1          | 11.11935   | 8.139839      | 6.727171      | 7.310647      |  |
| <b>AVG.</b>                      | 1          | 10.151374  | 5.067909      | 4.878734667   | 5.222118333   |  |
| <b>SEM</b>                       | 0          | 0.51113928 | 1.541504499   | 1.129988492   | 1.04527587    |  |
| <b>One way ANOVA (v.s. DENV)</b> |            | 0.0003     | 0.0196        | 0.0158        | 0.0236        |  |

E

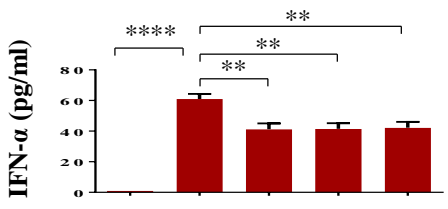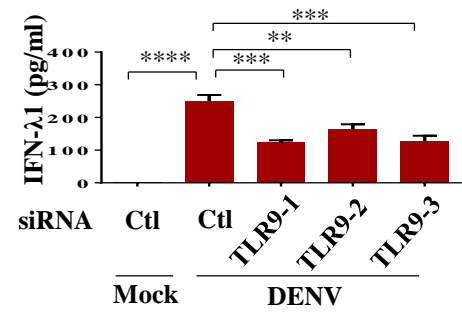

**ELISA IFN-α**

| experiment           | 24 hr          |             |               |               |               |
|----------------------|----------------|-------------|---------------|---------------|---------------|
|                      | mock siCtl     | DENV siCtl  | DENV siTLR9-1 | DENV siTLR9-2 | DENV siTLR9-3 |
| 1                    | 1              | 59.1255     | 45.956        | 39.456        | 38.921        |
| 2                    | 1              | 53.869      | 36            | 35.6          | 37.891        |
| 3                    | 1              | 62.21       | 42.136        | 41.865        | 43.674        |
| 4                    | 1              | 76.414      | 56.88         | 58.729        | 57.329        |
| 5                    | 1              | 59.8704     | 35.596        | 39.566        | 45.891        |
| 6                    | 1              | 54.284      | 30.988        | 33.673        | 29.723        |
| <b>AVG.</b>          | 1              | 60.96215    | 41.25933333   | 41.4815       | 42.23816667   |
| <b>SEM</b>           | 0              | 3.365474031 | 3.795025996   | 3.655862112   | 3.784481069   |
| <b>One way ANOVA</b> | <b>p value</b> |             |               |               |               |
|                      | (v.s. DENV)    | < 0.0001    | 0.001         | 0.0011        | 0.0017        |

**ELISA IFN-λ1**

| experiment           | 24 hr          |             |               |               |               |
|----------------------|----------------|-------------|---------------|---------------|---------------|
|                      | mock siCtl     | DENV siCtl  | DENV siTLR9-1 | DENV siTLR9-2 | DENV siTLR9-3 |
| 1                    | 1              | 287.77      | 119.7         | 140.46        | 100.99        |
| 2                    | 1              | 229.11      | 137.07        | 191.66        | 155.72        |
| 3                    | 1              | 232.69      | 111.02        | 160.97        | 127.94        |
| <b>AVG.</b>          | 1              | 249.8566667 | 122.5966667   | 164.3633333   | 128.2166667   |
| <b>SEM</b>           | 0              | 18.98481616 | 7.658190242   | 14.8772313    | 15.79979571   |
| <b>One way ANOVA</b> | <b>p value</b> |             |               |               |               |
|                      | (v.s. DENV)    | < 0.0001    | 0.0002        | 0.0044        | 0.0003        |

F

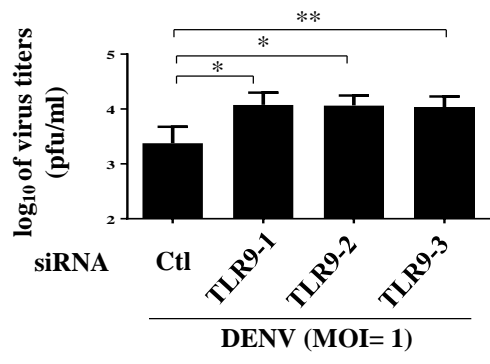

**Virus titer**

| experiment              | 24 hr          |               |               |               |
|-------------------------|----------------|---------------|---------------|---------------|
|                         | DENV siCtl     | DENV siTLR9-1 | DENV siTLR9-2 | DENV siTLR9-3 |
| 1                       | 2.740363       | 4             | 3.619789      | 3.594761      |
| 2                       | 3.740363       | 4.414973      | 4.361728      | 4.371068      |
| 3                       | 3              | 3.477121      | 3.920819      | 3.778151      |
| 4                       | 4.021189       | 4.414973      | 4.361728      | 4.371068      |
| <b>AVG.</b>             | 3.37547875     | 4.07676675    | 4.066016      | 4.028762      |
| <b>SEM</b>              | 0.301998696    | 0.222529978   | 0.181450608   | 0.201144545   |
| <b>Student's T test</b> | <b>p value</b> |               |               |               |
|                         | (v.s. DENV)    | 0.037         | 0.0142        | 0.0099        |
