# Supplementary material
Source: PubMed Central journal article supplement (PMC6073071)
Supplement: EMBR-19-e46182-s005.pdf [file EMBR-19-e46182-s005.pdf]

A

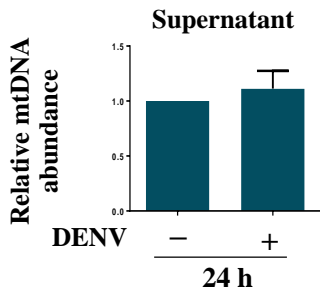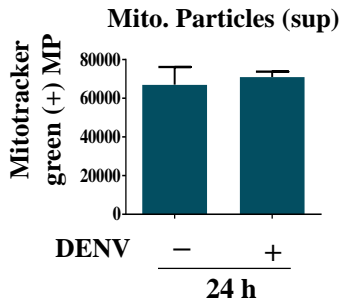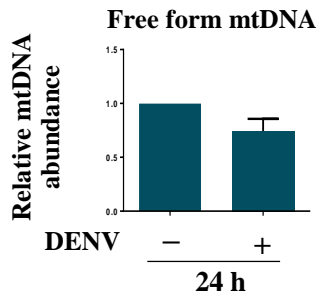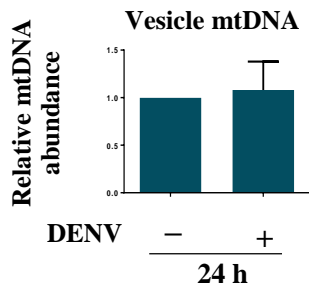

| mtDNA (sup.)     |                     | 24 hr       |  |
|------------------|---------------------|-------------|--|
| experiment       | mock                | DENV        |  |
| 1                | 1                   | 0.9427845   |  |
| 2                | 1                   | 1.257013    |  |
| 3                | 1                   | 1.489677    |  |
| 4                | 1                   | 1.775633    |  |
| 5                | 1                   | 0.9559453   |  |
| 6                | 1                   | 0.5069798   |  |
| 7                | 1                   | 0.863539    |  |
| AVG.             | 1                   | 1.113081657 |  |
| SEM              | 0                   | 0.160715552 |  |
| Student's T test | p value (v.s. mock) | 0.4951      |  |

| Mito. particles (sup.) |                     | 24 hr       |  |
|------------------------|---------------------|-------------|--|
| experiment             | mock                | DENV        |  |
| 1                      | 80630               | 78268       |  |
| 2                      | 73026               | 64247       |  |
| 3                      | 77354               | 75630       |  |
| 4                      | 73261               | 69602       |  |
| 5                      | 21933               | 61654       |  |
| 6                      | 76169               | 76305       |  |
| AVG.                   | 67062.16667         | 70951       |  |
| SEM                    | 9098.675499         | 2812.439463 |  |
| Student's T test       | p value (v.s. mock) | 0.6916      |  |

| Free form mtDNA  |                     | 24 hr       |  |
|------------------|---------------------|-------------|--|
| experiment       | mock                | DENV        |  |
| 1                | 1                   | 0.6579273   |  |
| 2                | 1                   | 0.6040193   |  |
| 3                | 1                   | 0.9717565   |  |
| 4                | 1                   | 0.4401295   |  |
| 5                | 1                   | 1.04006     |  |
| AVG.             | 1                   | 0.74277852  |  |
| SEM              | 0                   | 0.113766751 |  |
| Student's T test | p value (v.s. mock) | 0.0536      |  |

| Vesicle mtDNA    |                     | 24 hr       |  |
|------------------|---------------------|-------------|--|
| experiment       | mock                | DENV        |  |
| 1                | 1                   | 0.6169961   |  |
| 2                | 1                   | 0.6524774   |  |
| 3                | 1                   | 2.027919    |  |
| 4                | 1                   | 0.5594186   |  |
| 5                | 1                   | 1.546493    |  |
| AVG.             | 1                   | 1.08066082  |  |
| SEM              | 0                   | 0.298690236 |  |
| Student's T test | p value (v.s. mock) | 0.794       |  |

**B**

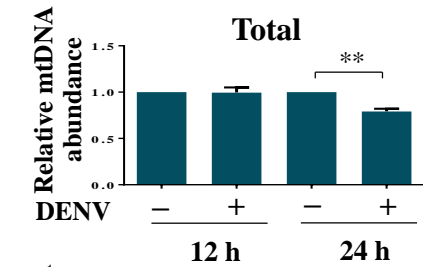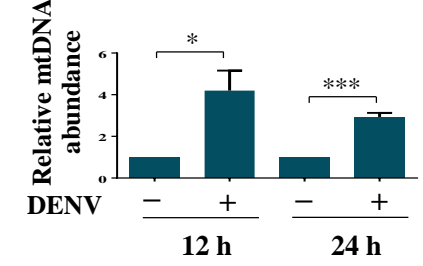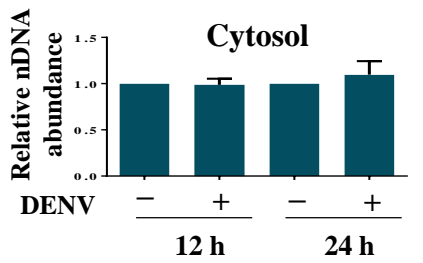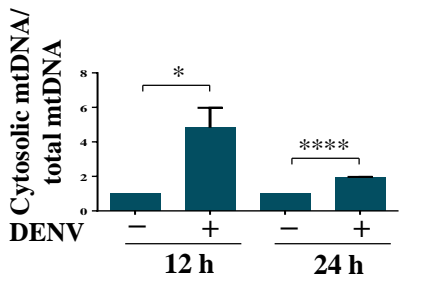

**Total mtDNA**

| experiment       | 12 hr               |             | 24 hr  |             |
|------------------|---------------------|-------------|--------|-------------|
|                  | mock                | DENV        | mock   | DENV        |
| 1                | 1                   | 1.031341    | 1      | 0.791134    |
| 2                | 1                   | 1.068122    | 1      | 0.841059    |
| 3                | 1                   | 0.893023    | 1      | 0.747845    |
| AVG.             | 1                   | 0.997495333 | 1      | 0.793346    |
| SEM              | 0                   | 0.053304352 | 0      | 0.026931284 |
| Student's T test | p value (v.s. mock) |             | 0.9648 |             |
|                  |                     |             | 0.0016 |             |

**Cytosol mtDNA**

| experiment       | 12 hr               |             | 24 hr  |             |
|------------------|---------------------|-------------|--------|-------------|
|                  | mock                | DENV        | mock   | DENV        |
| 1                | 1                   | 4.287094    | 1      | 3.149232    |
| 2                | 1                   | 2.488023    | 1      | 3.105876    |
| 3                | 1                   | 5.81589     | 1      | 2.549121    |
| AVG.             | 1                   | 4.197002333 | 1      | 2.934743    |
| SEM              | 0                   | 0.961727972 | 0      | 0.193216787 |
| Student's T test | p value (v.s. mock) |             | 0.0293 |             |
|                  |                     |             | 0.0006 |             |

**Cytosol nDNA**

| experiment       | 12 hr               |          | 24 hr  |          |
|------------------|---------------------|----------|--------|----------|
|                  | mock                | DENV     | mock   | DENV     |
| 1                | 1                   | 0.942785 | 1      | 0.613442 |
| 2                | 1                   | 1.156688 | 1      | 1.060688 |
| 3                | 1                   | 1.006956 | 1      | 0.923382 |
| AVG.             | 1                   | 1.035476 | 1      | 0.865837 |
| SEM              | 0                   | 0.063374 | 0      | 0.132276 |
| Student's T test | p value (v.s. mock) |          | 0.6055 |          |
|                  |                     |          | 0.3678 |          |

**Cytosol/ total mtDNA**

| experiment       | 12 hr               |             | 24 hr    |             |
|------------------|---------------------|-------------|----------|-------------|
|                  | mock                | DENV        | mock     | DENV        |
| 1                | 1                   | 4.439752    | 1        | 1.90925     |
| 2                | 1                   | 3.052356    | 1        | 2.013523    |
| 3                | 1                   | 6.98002     | 1        | 1.826635    |
| AVG.             | 1                   | 4.824042667 | 1        | 1.916469333 |
| SEM              | 0                   | 1.149984871 | 0        | 0.054070541 |
| Student's T test | p value (v.s. mock) |             | 0.0292   |             |
|                  |                     |             | < 0.0001 |             |

DENV (m.o.i.=5) 24 hr - +

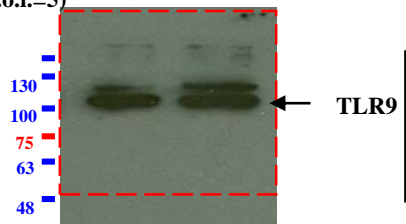

IP: TLR9

**IP: TLR9/qPCR: mtDNA**

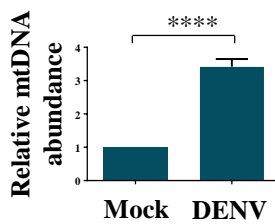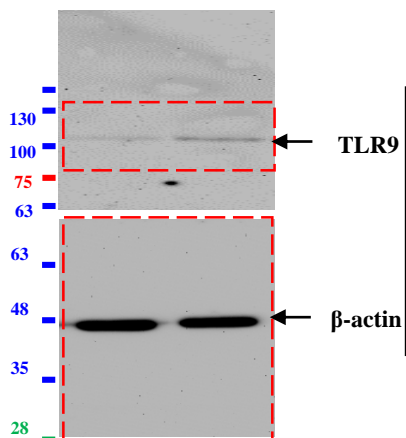

input

**IP:TLR9 qPCR: mtDNA**

| experiment       | 24 hr               |             |
|------------------|---------------------|-------------|
|                  | mock                | DENV        |
| 1                | 1                   | 3.434262    |
| 2                | 1                   | 3.446185    |
| 3                | 1                   | 2.838247    |
| 4                | 1                   | 3.958627    |
| AVG.             | 1                   | 3.41933025  |
| SEM              | 0                   | 0.229027448 |
| Student's T test | p value (v.s. mock) |             |
|                  | < 0.0001            |             |

C

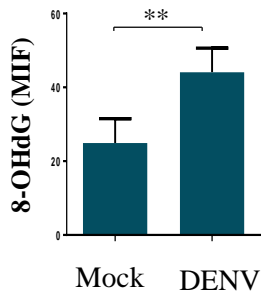

| 8-OHdG MIF       |                     | 24 hr       |  |
|------------------|---------------------|-------------|--|
| experiment       | mock                | DENV        |  |
| 1                | 35.59               | 56.32       |  |
| 2                | 26.37               | 41.89       |  |
| 3                | 12.78               | 34.19       |  |
| AVG.             | 24.91333333         | 44.13333333 |  |
| SEM              | 6.624837944         | 6.48610395  |  |
| Student's T test | p value (v.s. mock) | 0.0092      |  |

D

### D-I 8-OHdG (cytosol)

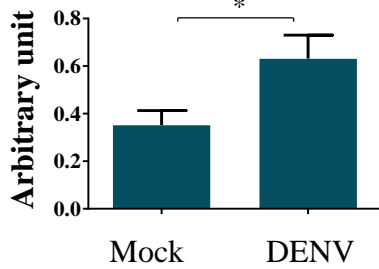

| 8-OHdG cytosol   |                     | 24 hr       |  |
|------------------|---------------------|-------------|--|
| experiment       | mock                | DENV        |  |
| 1                | 0.341               | 0.554       |  |
| 2                | 0.1605              | 0.304       |  |
| 3                | 0.3735              | 0.823       |  |
| 4                | 0.336               | 0.632       |  |
| 5                | 0.546               | 0.845       |  |
| AVG.             | 0.3514              | 0.6316      |  |
| SEM              | 0.061296696         | 0.098872949 |  |
| Student's T test | p value (v.s. mock) | 0.0426      |  |

### D-II Cytosol

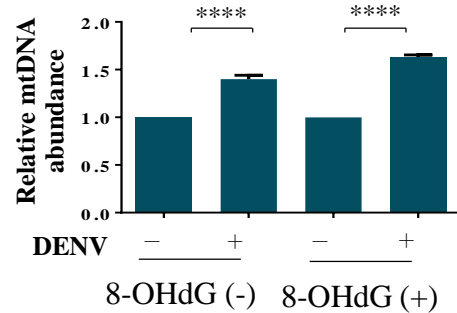

| Cytosol mtDNA    |                     | 8-OHdG (-)  |      | 8-OHdG (+)  |  |
|------------------|---------------------|-------------|------|-------------|--|
| experiment       | mock                | DENV        | mock | DENV        |  |
| 1                | 1                   | 1.394744    | 1    | 1.670176    |  |
| 2                | 1                   | 1.292353    | 1    | 1.60214     |  |
| 3                | 1                   | 1.484524    | 1    | 1.630145    |  |
| 4                | 1                   | 1.428994    |      |             |  |
| AVG.             | 1                   | 1.40015375  | 1    | 1.634153667 |  |
| SEM              | 0                   | 0.040414896 | 0    | 0.01974231  |  |
| Student's T test | p value (v.s. mock) | < 0.0001    |      | < 0.0001    |  |

### D-III 8-OHdG

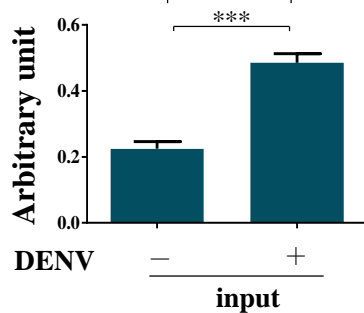

| 8-OHdG input     |                     | 24 hr       |  |
|------------------|---------------------|-------------|--|
| experiment       | mock                | DENV        |  |
| 1                | 0.1605              | 0.468       |  |
| 2                | 0.244               | 0.5635      |  |
| 3                | 0.244               | 0.435       |  |
| 4                | 0.25                | 0.4745      |  |
| AVG.             | 0.224625            | 0.48525     |  |
| SEM              | 0.021421733         | 0.027479159 |  |
| Student's T test | p value (v.s. mock) | 0.0003      |  |

### D-IV 8-OHdG (cytosol)

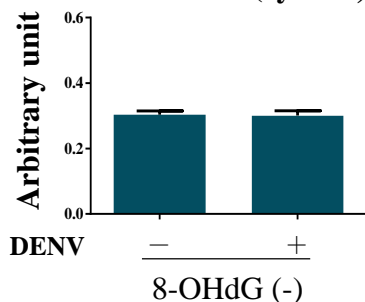

| 8-OHdG input     |                     | 24 hr       |  |
|------------------|---------------------|-------------|--|
| experiment       | mock                | DENV        |  |
| 1                | 0.307               | 0.3045      |  |
| 2                | 0.328               | 0.332       |  |
| 3                | 0.3045              | 0.3045      |  |
| 4                | 0.2745              | 0.262       |  |
| AVG.             | 0.3035              | 0.30075     |  |
| SEM              | 0.011009466         | 0.014451788 |  |
| Student's T test | p value (v.s. mock) | 0.8846      |  |
