# Supplementary material
Source: PubMed Central journal article supplement (PMC6073071)
Supplement: EMBR-19-e46182-s006.pdf [file EMBR-19-e46182-s006.pdf]

**A**

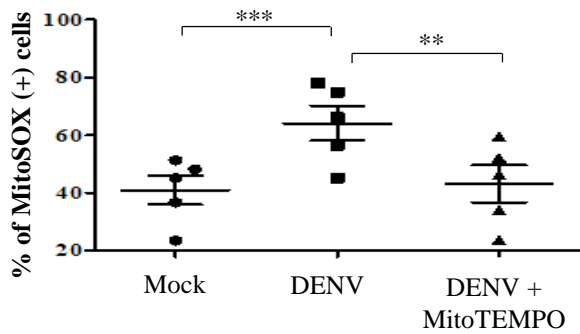

| experiment              | % of mitoSOX + |                            |                |
|-------------------------|----------------|----------------------------|----------------|
|                         | mock           | DENV                       | DENV MitoTEMPO |
| 1                       | 36.71          | 56.52                      | 34.08          |
| 2                       | 48.15          | 66.26                      | 59.58          |
| 3                       | 23.5           | 45.2                       | 23.74          |
| 4                       | 45.19          | 77.88                      | 46.32          |
| 5                       | 51.36          | 74.8                       | 52.14          |
| <b>AVG.</b>             | 40.982         | 64.132                     | 43.172         |
| <b>SEM</b>              | 4.47509        | 5.380354                   | 5.726515       |
| <b>Student's T test</b> |                | <b>p value (v.s. DENV)</b> |                |
|                         |                | 0.0008                     | 0.0064         |

**B**

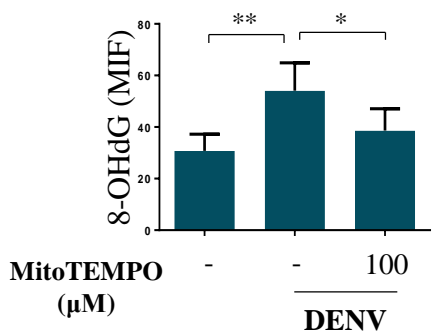

| experiment                       | 8-OHdG MIF  |             |                |
|----------------------------------|-------------|-------------|----------------|
|                                  | mock        | DENV        | DENV MitoTEMPO |
| 1                                | 35.59       | 56.32       | 46.03          |
| 2                                | 50.13       | 92.77       | 57.21          |
| 3                                | 26.37       | 41.89       | 35.57          |
| 4                                | 12.78       | 34.19       | 14.6           |
| 5                                | 13.85       | 23          | 15.25          |
| 6                                | 45.91       | 76.45       | 63.32          |
| <b>AVG.</b>                      | 30.77166667 | 54.10333333 | 38.66333333    |
| <b>SEM</b>                       | 6.471857238 | 10.82053901 | 8.451813875    |
| <b>One way ANOVA (v.s. DENV)</b> | 0.0094      |             | 0.036          |

**C**

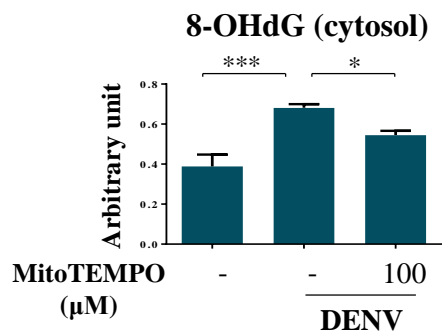

| experiment                       | 8-OHdG cytosol |             |                |
|----------------------------------|----------------|-------------|----------------|
|                                  | mock           | DENV        | DENV MitoTEMPO |
| 1                                | 0.33           | 0.67        | 0.58           |
| 2                                | 0.68           | 0.75        | 0.59           |
| 3                                | 0.31           | 0.71        | 0.59           |
| 4                                | 0.29           | 0.62        | 0.55           |
| 5                                | 0.35           | 0.66        | 0.47           |
| 6                                | 0.37           | 0.68        | 0.49           |
| <b>AVG.</b>                      | 0.388333333    | 0.681666667 | 0.545          |
| <b>SEM</b>                       | 0.059465209    | 0.018150605 | 0.021563859    |
| <b>One way ANOVA (v.s. DENV)</b> | 0.0001         |             | 0.045          |

**D**

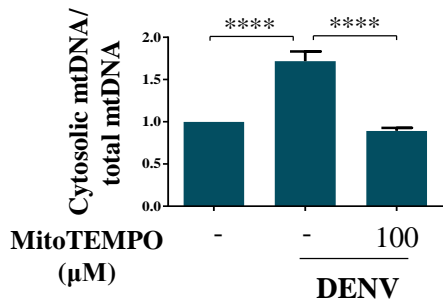

| experiment                       | Cytosol/total mtDNA |            |                |
|----------------------------------|---------------------|------------|----------------|
|                                  | mock                | DENV       | DENV MitoTEMPO |
| 1                                | 1.001062            | 1.512048   | 0.9349513      |
| 2                                | 1.000893            | 1.959056   | 0.7961037      |
| 3                                | 1.000178            | 1.53108    | 0.9558709      |
| 4                                | 1.00013             | 1.867962   | 0.8830541      |
| <b>AVG.</b>                      | 1.00056575          | 1.7175365  | 0.892495       |
| <b>SEM</b>                       | 0.000240414         | 0.11472832 | 0.035589623    |
| <b>One way ANOVA (v.s. DENV)</b> | < 0.0001            |            | < 0.0001       |

E

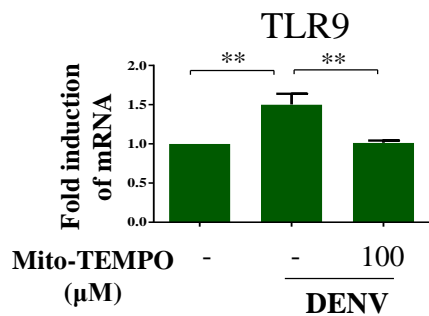

|               |                     | 24 hr       |                |  |
|---------------|---------------------|-------------|----------------|--|
| experiment    | mock                | DENV        | DENV MitoTEMPO |  |
| 1             | 1                   | 1.892       | 1.005          |  |
| 2             | 1                   | 1.353       | 1.088          |  |
| 3             | 1                   | 1.277624    | 0.9434182      |  |
| 4             | 1                   | 1.485       | 1.017          |  |
| AVG.          | 1                   | 1.501906    | 1.01335455     |  |
| SEM           | 0                   | 0.136910723 | 0.029645298    |  |
| One way ANOVA | p value (v.s. DENV) | 0.0035      | 0.0042         |  |

F

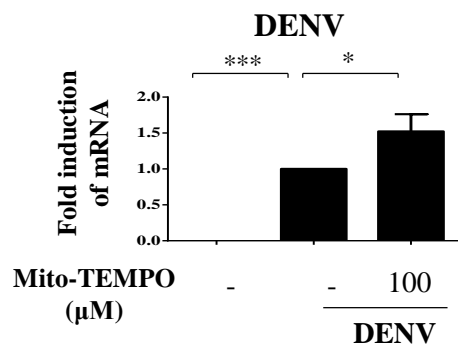

|               |                     | 24 hr  |                |  |
|---------------|---------------------|--------|----------------|--|
| experiment    | mock                | DENV   | DENV MitoTEMPO |  |
| 1             | 0                   | 1      | 1.32           |  |
| 2             | 0                   | 1      | 1              |  |
| 3             | 0                   | 1      | 2.676          |  |
| 4             | 0                   | 1      | 1.248          |  |
| 5             | 0                   | 1      | 1.376          |  |
| 6             | 0                   | 1      | 1.511          |  |
| AVG.          | 0                   | 1      | 1.521833333    |  |
| SEM           | 0                   | 0      | 0.240936841    |  |
| One way ANOVA | p value (v.s. DENV) | 0.0003 | 0.0363         |  |

G

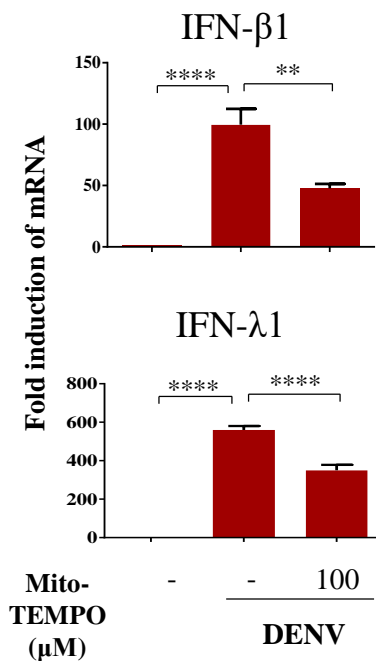

|               |                     | 24 hr       |                |  |
|---------------|---------------------|-------------|----------------|--|
| experiment    | mock                | DENV        | DENV MitoTEMPO |  |
| 1             | 1                   | 128.8903    | 58.48521       |  |
| 2             | 1                   | 66.02772    | 44.3235        |  |
| 3             | 1                   | 103.6086    | 43.26115       |  |
| 4             | 1                   | 99.73307    | 44.6318        |  |
| AVG.          | 1                   | 99.5649225  | 47.675415      |  |
| SEM           | 0                   | 12.91349849 | 3.615203197    |  |
| One way ANOVA | p value (v.s. DENV) | <0.0001     | 0.0021         |  |

|               |                     | 24 hr       |                |  |
|---------------|---------------------|-------------|----------------|--|
| experiment    | mock                | DENV        | DENV MitoTEMPO |  |
| 1             | 1                   | 560.2784    | 326.2875       |  |
| 2             | 1                   | 580.0365    | 393.44         |  |
| 3             | 1                   | 503.2041    | 398.9323       |  |
| 4             | 1                   | 596.3436    | 283.067        |  |
| AVG.          | 1                   | 559.96565   | 350.4317       |  |
| SEM           | 0                   | 20.30633242 | 27.87317598    |  |
| One way ANOVA | p value (v.s. DENV) | <0.0001     | <0.0001        |  |

H

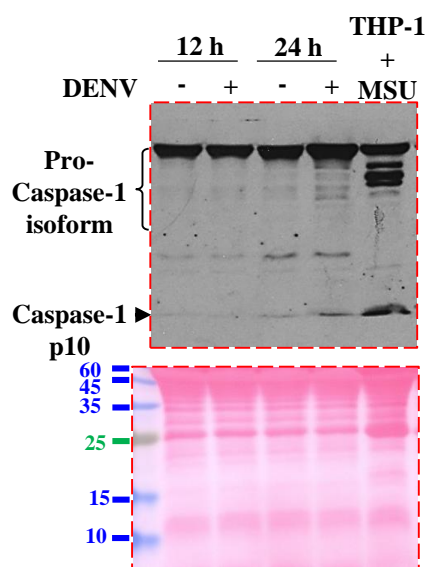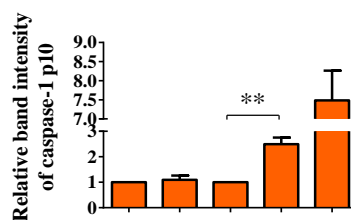

|                  |                     | 12 hr       |        | 24 hr       |             |  |
|------------------|---------------------|-------------|--------|-------------|-------------|--|
| experiment       | mock                | DENV        | mock   | DENV        | THP-1+ MSU  |  |
| 1                | 1                   | 1.428137    | 1      | 1.977884    | 5.933653    |  |
| 2                | 1                   | 0.937495    | 1      | 2.810234    | 8.430701    |  |
| 3                | 1                   | 0.913769    | 1      | 2.695425    | 8.086273    |  |
| AVG.             | 1                   | 1.093133667 | 1      | 2.494514333 | 7.483542333 |  |
| SEM              | 0                   | 0.167641637 | 0      | 0.260432623 | 0.781297078 |  |
| Student's T test | p value (v.s. mock) | 0.6081      | 0.0046 | 0.0012      |             |  |

I

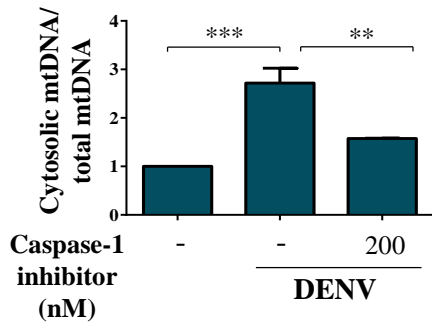

| Cytosol/total mtDNA       |         | 24 hr       |                 |
|---------------------------|---------|-------------|-----------------|
| experiment                | mock    | DENV        | DENV Caspase-Li |
| 1                         | 1       | 2.211461    | 1.569168        |
| 2                         | 1       | 3.271608    | 1.563739        |
| 3                         | 1       | 2.675855    | 1.591073        |
| AVG.                      | 1       | 2.719641333 | 1.57466         |
| SEM                       | 0       | 0.306820169 | 0.008354808     |
| One way ANOVA (v.s. DENV) | p value | 0.0009      | 0.0076          |

J

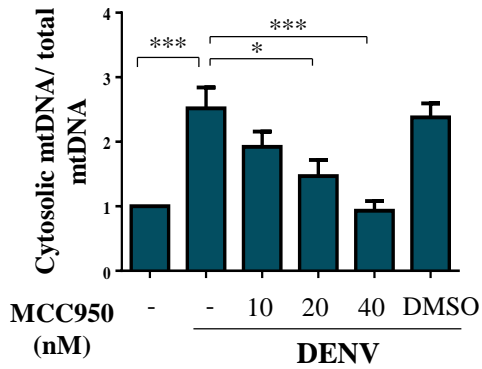

| Cytosol/total mtDNA       |         | 24 hr      |                |                |                |            |
|---------------------------|---------|------------|----------------|----------------|----------------|------------|
| experiment                | mock    | DENV       | DENV MCC950 10 | DENV MCC950 20 | DENV MCC950 40 | DENV DMSO  |
| 1                         | 1       | 2.979355   | 1.765406       | 2.143547       | 0.760489       | 2.789487   |
| 2                         | 1       | 1.607702   | 1.394744       | 0.923382       | 0.594604       | 1.79005    |
| 3                         | 1       | 2.979355   | 2.522755       | 1.448942       | 1.252664       | 2.361985   |
| 4                         | 1       | 2.505329   | 2.006943       | 1.351911       | 1.113422       | 2.575763   |
| AVG.                      | 1       | 2.51793525 | 1.922462       | 1.4669455      | 0.93029475     | 2.37932125 |
| SEM                       | 0       | 0.32332902 | 0.236403892    | 0.2527858      | 0.152473986    | 0.21493535 |
| One way ANOVA (v.s. DENV) | p value | 0.0006     | 0.2439         | 0.0145         | 0.0004         | 0.9889     |
