# Supplementary material
Source: PubMed Central journal article supplement (PMC6073071)
Supplement: EMBR-19-e46182-s007.pdf [file EMBR-19-e46182-s007.pdf]

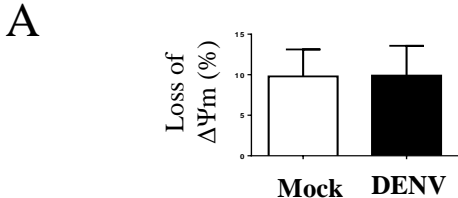

| experiment       | 24 hr                        |             |
|------------------|------------------------------|-------------|
|                  | mock                         | DENV        |
| 1                | 6.44                         | 5.8         |
| 2                | 19.72                        | 20.84       |
| 3                | 5.7                          | 7.49        |
| 4                | 7.32                         | 5.46        |
| AVG.             | 9.795                        | 9.8975      |
| SEM              | 3.324859646                  | 3.674407832 |
| Student's T test | p value (v.s. mock) = 0.9842 |             |

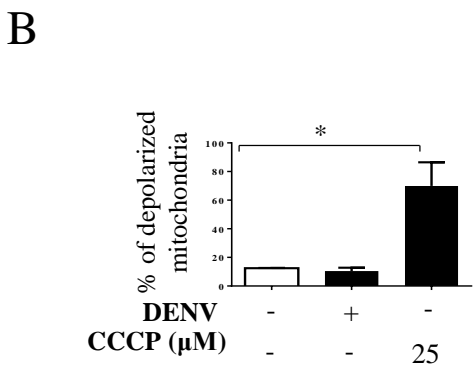

| experiment       | 24 hr                        |             |             |
|------------------|------------------------------|-------------|-------------|
|                  | mock                         | DENV        | CCCP        |
| 1                | 12.4                         | 14.2        | 83.5        |
| 2                | 12.8                         | 5.96        | 89.2        |
| 3                | 12.2                         | 11.1        | 37.2        |
| AVG.             | 12.46666667                  | 10.42       | 69.96666667 |
| SEM              | 0.176383421                  | 2.402859408 | 16.46575571 |
| Student's T test | p value (v.s. mock) = 0.4435 |             | 0.0251      |

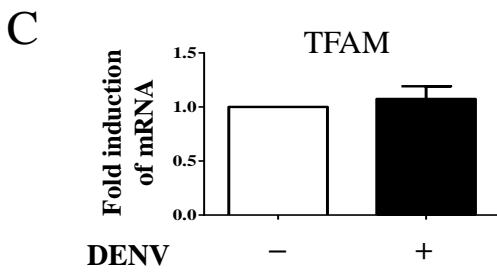

| experiment       | 24 hr                        |             |
|------------------|------------------------------|-------------|
|                  | mock                         | DENV        |
| 1                | 1                            | 0.97942     |
| 2                | 1                            | 1.132884    |
| 3                | 1                            | 1.670176    |
| 4                | 1                            | 1.132884    |
| 5                | 1                            | 0.632878    |
| 6                | 1                            | 1.013959    |
| 7                | 1                            | 0.959264    |
| AVG.             | 1                            | 1.074495    |
| SEM              | 0                            | 0.117783298 |
| Student's T test | p value (v.s. mock) = 0.5389 |             |

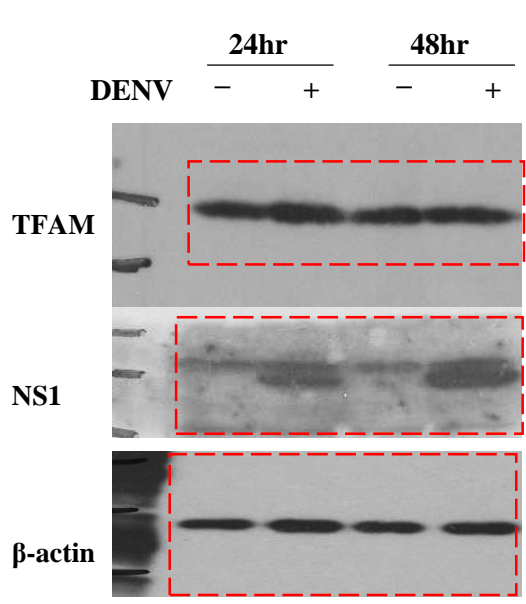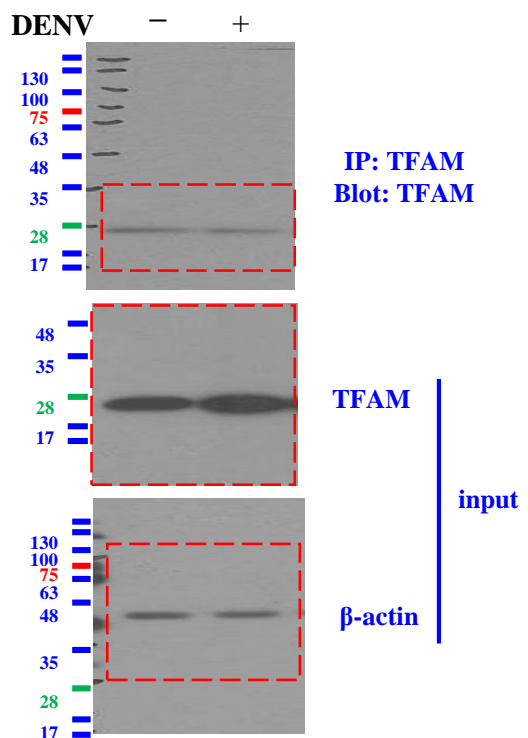

C

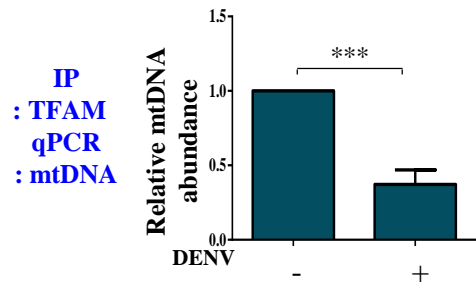

| IP:TFAM/<br>qPCR: mtDNA | 24 hr |             |
|-------------------------|-------|-------------|
|                         | mock  | DENV        |
| experiment              |       |             |
| 1                       | 1     | 0.216885    |
| 2                       | 1     | 0.562529    |
| 3                       | 1     | 0.51943     |
| 4                       | 1     | 0.187505    |
| AVG.                    | 1     | 0.37158725  |
| SEM                     | 0     | 0.098376526 |
| Student's T test        |       | 0.0007      |
| p value (v.s. mock)     |       |             |

D

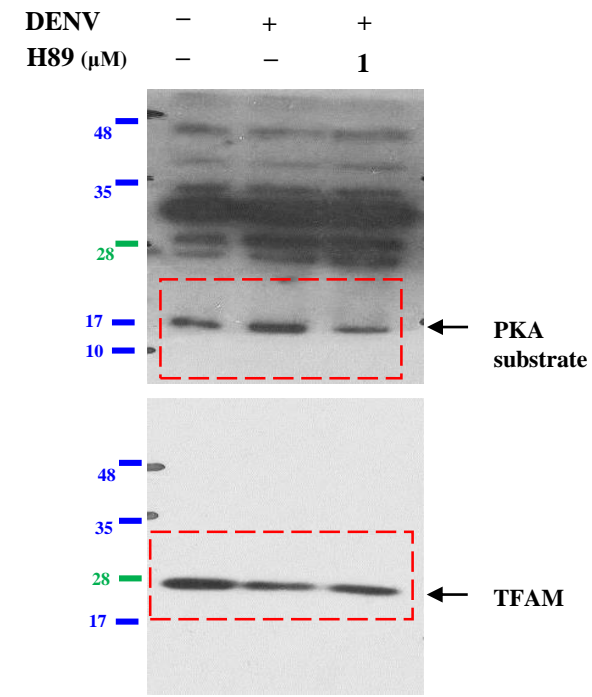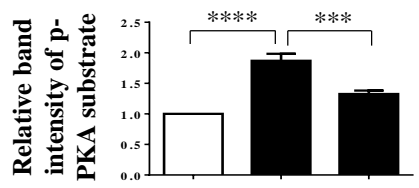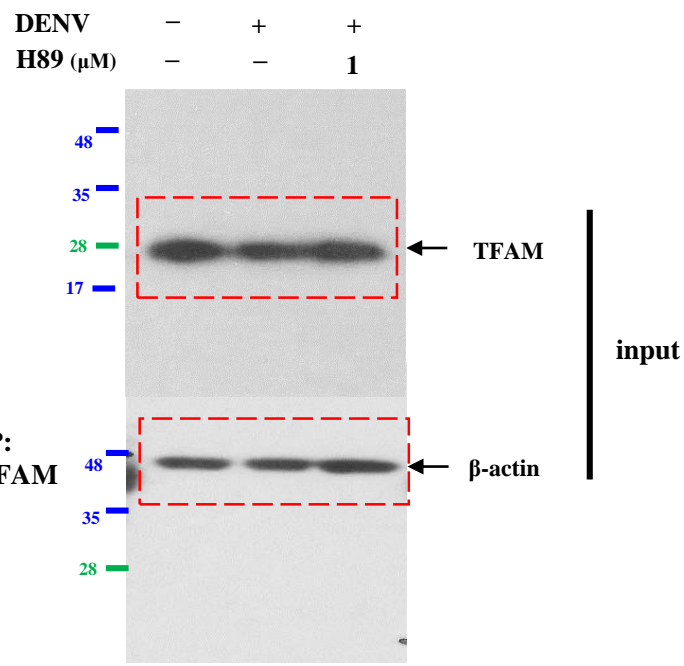

| P-PKA                     | 24 hr |             |             |
|---------------------------|-------|-------------|-------------|
|                           | mock  | DENV        | DENV H89    |
| experiment                |       |             |             |
| 1                         | 1     | 1.645       | 1.409       |
| 2                         | 1     | 2.638713241 | 1.17657     |
| 3                         | 1     | 1.870907206 | 1.205608    |
| 4                         | 1     | 2.186798205 | 1.430746    |
| 5                         | 1     | 1.774006103 | 1.258409    |
| AVG.                      | 1     | 2.023084951 | 1.296066707 |
| SEM                       | 0     | 0.178037466 | 0.05233196  |
| One way ANOVA (v.s. DENV) |       | < 0.0001    | 0.0009      |
| p value                   |       |             |             |

E

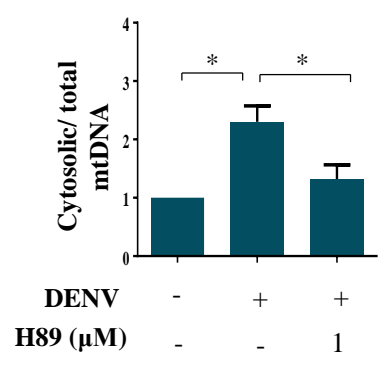

| Cytosol/total mtDNA       | 24 hr |             |             |
|---------------------------|-------|-------------|-------------|
|                           | mock  | DENV        | DENV H89    |
| experiment                |       |             |             |
| 1                         | 1.    | 1.979313    | 0.515842    |
| 2                         | 1.    | 1.885569    | 1.347234    |
| 3                         | 1.    | 3.351948    | 2.056228    |
| 4                         | 1.    | 1.993080    | 1.370783    |
| 5                         | 1.    | 2.302478    | 1.322522    |
| AVG.                      | 1     | 2.3024775   | 1.32252175  |
| SEM                       | 0     | 0.350637887 | 0.315171504 |
| One way ANOVA (v.s. DENV) |       | 0.0116      | 0.0130      |
| p value                   |       |             |             |

F

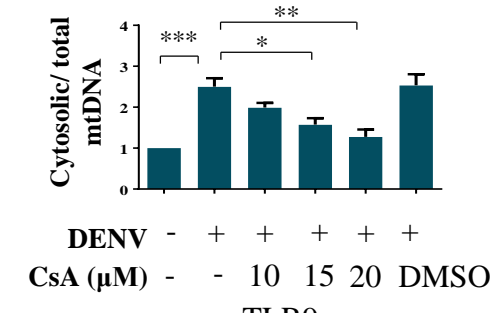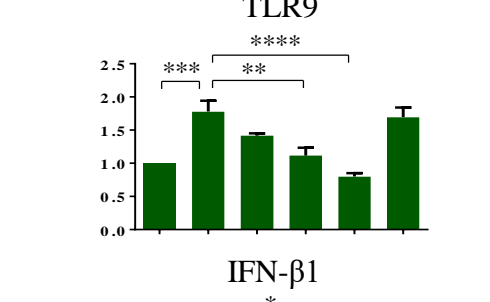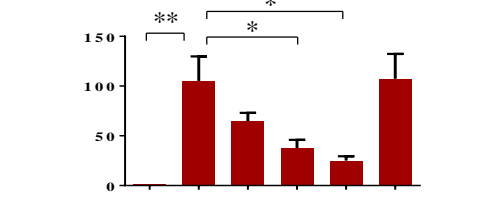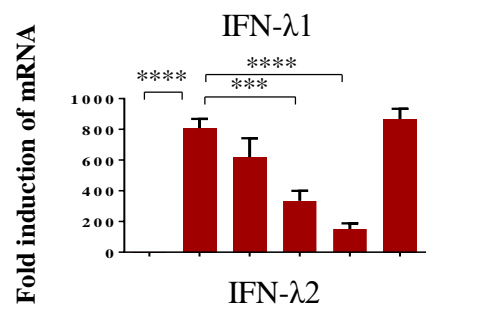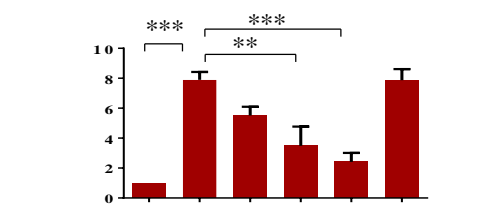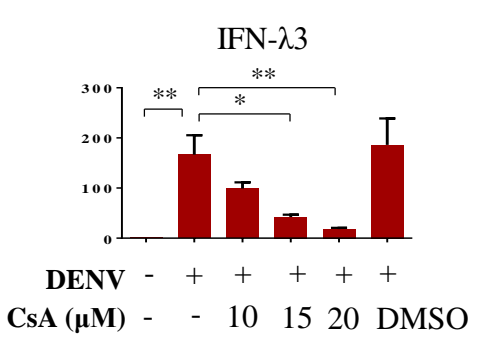

| Cytosol/total mtDNA |                     | 24 hr       |             |             |             |             |  |
|---------------------|---------------------|-------------|-------------|-------------|-------------|-------------|--|
| experiment          | mock                | DENV        | DENV CsA 10 | DENV CsA 20 | DENV CsA 40 | DENV DMSO   |  |
| 1                   | 1                   | 2.741566    | 2.143547    | 1.85961     | 1.624505    | 3.000078    |  |
| 2                   | 1                   | 2.084932    | 1.771535    | 1.319508    | 1.042466    | 2.063366    |  |
| 3                   | 1                   | 2.675855    | 2.063366    | 1.542211    | 1.160704    | 2.540302    |  |
| AVG.                | 1                   | 2.500784333 | 1.992816    | 1.573776333 | 1.275891667 | 2.534582    |  |
| SEM                 | 0                   | 0.208789652 | 0.113035701 | 0.156710796 | 0.177617096 | 0.270420587 |  |
| One way ANOVA       | p value (v.s. DENV) | 0.0003      | 0.3187      | 0.0145      | 0.0018      | > 0.9999    |  |

| TLR9 mRNA     |                     | 24 hr      |             |             |             |             |  |
|---------------|---------------------|------------|-------------|-------------|-------------|-------------|--|
| experiment    | mock                | DENV       | DENV CsA 10 | DENV CsA 20 | DENV CsA 40 | DENV DMSO   |  |
| 1             | 1                   | 1.301342   | 1.370783    | 1.265757    | 0.885768    | 1.30586     |  |
| 2             | 1                   | 1.885569   | 1.505247    | 1.265757    | 0.879649    | 1.670176    |  |
| 3             | 1                   | 1.905276   | 1.433955    | 1.164734    | 0.750019    | 1.802501    |  |
| 4             | 1                   | 2.027919   | 1.351911    | 0.765779    | 0.692555    | 2           |  |
| AVG.          | 1                   | 1.7800265  | 1.415474    | 1.11550675  | 0.80199775  | 1.69463425  |  |
| SEM           | 0                   | 0.16263871 | 0.034687028 | 0.118982876 | 0.048068248 | 0.146238134 |  |
| One way ANOVA | p value (v.s. DENV) | 0.0003     | 0.1194      | 0.0014      | < 0.0001    | > 0.9999    |  |

| IFN-β1 mRNA   |                     | 24 hr       |             |             |             |             |  |
|---------------|---------------------|-------------|-------------|-------------|-------------|-------------|--|
| experiment    | mock                | DENV        | DENV CsA 10 | DENV CsA 20 | DENV CsA 40 | DENV DMSO   |  |
| 1             | 1                   | 94.6808     | 80.44886    | 53.26072    | 25.36909    | 95.33936    |  |
| 2             | 1                   | 68.5935     | 51.26847    | 25.10669    | 17.26765    | 71.25898    |  |
| 3             | 1                   | 152.2185    | 62.03455    | 34.77552    | 32.4467     | 155.4169    |  |
| AVG.          | 1                   | 105.1642667 | 64.58396    | 37.71431    | 25.02781333 | 107.3384133 |  |
| SEM           | 0                   | 24.70298539 | 8.519554148 | 8.25913063  | 4.385135576 | 25.02413392 |  |
| One way ANOVA | p value (v.s. DENV) | 0.0021      | 0.4223      | 0.0438      | 0.0148      | > 0.9999    |  |

| IFN-λ1 mRNA   |                     | 24 hr       |             |             |             |             |  |
|---------------|---------------------|-------------|-------------|-------------|-------------|-------------|--|
| experiment    | mock                | DENV        | DENV CsA 10 | DENV CsA 20 | DENV CsA 40 | DENV DMSO   |  |
| 1             | 1                   | 837.5317    | 784.1577    | 439.5855    | 213.0429    | 968.763     |  |
| 2             | 1                   | 661.6846    | 410.1478    | 206.5003    | 77.43962    | 752.2143    |  |
| 3             | 1                   | 952.1203    | 876.1293    | 453.513     | 214.5247    | 995.9987    |  |
| 4             | 1                   | 778.7411    | 403.1017    | 238.0301    | 99.73307    | 749.6119    |  |
| AVG.          | 1                   | 807.519425  | 618.384125  | 334.407225  | 151.1850725 | 866.646975  |  |
| SEM           | 0                   | 60.48838585 | 123.7006949 | 65.12640712 | 36.4280107  | 67.05196816 |  |
| One way ANOVA | p value (v.s. DENV) | < 0.0001    | 0.3523      | 0.0007      | < 0.0001    | > 0.9999    |  |

| IFN-λ2 mRNA   |                     | 24 hr       |             |             |             |             |  |
|---------------|---------------------|-------------|-------------|-------------|-------------|-------------|--|
| experiment    | mock                | DENV        | DENV CsA 10 | DENV CsA 20 | DENV CsA 40 | DENV DMSO   |  |
| 1             | 1                   | 7.412704    | 6.680703    | 5.876675    | 3.482202    | 7.185059    |  |
| 2             | 1                   | 8.938297    | 4.976047    | 1.484524    | 1.404445    | 9.350218    |  |
| 3             | 1                   | 7.336032    | 4.873641    | 3.09513     | 2.353813    | 7.08614     |  |
| AVG.          | 1                   | 7.895677667 | 5.510130333 | 3.485443    | 2.413486667 | 7.873805667 |  |
| SEM           | 0                   | 0.521779313 | 0.586032429 | 1.282836152 | 0.600538438 | 0.738758254 |  |
| One way ANOVA | p value (v.s. DENV) | 0.0001      | 0.1933      | 0.0052      | 0.0009      | > 0.9999    |  |

| IFN-λ3 mRNA   |                     | 24 hr       |             |             |             |             |  |
|---------------|---------------------|-------------|-------------|-------------|-------------|-------------|--|
| experiment    | mock                | DENV        | DENV CsA 10 | DENV CsA 20 | DENV CsA 40 | DENV DMSO   |  |
| 1             | 1                   | 279.17      | 125.3658    | 54.75808    | 24.59       | 341.3245    |  |
| 2             | 1                   | 109.5162    | 84.44851    | 40.08526    | 19.09337    | 109.1373    |  |
| 3             | 1                   | 156.498     | 113.3782    | 42.22425    | 13.31518    | 160.8977    |  |
| 4             | 1                   | 121.5158    | 73.51669    | 31.23302    | 15.13692    | 133.4356    |  |
| AVG.          | 1                   | 166.675     | 99.1773     | 42.0751525  | 18.0338675  | 186.198775  |  |
| SEM           | 0                   | 38.79989059 | 12.12059973 | 4.851034162 | 2.496059151 | 52.77827719 |  |
| One way ANOVA | p value (v.s. DENV) | 0.0022      | 0.4865      | 0.0233      | 0.0058      | > 0.9999    |  |
