# Supplementary material
Source: PubMed Central journal article supplement (PMC6073071)
Supplement: EMBR-19-e46182-s008.pdf [file EMBR-19-e46182-s008.pdf]

**A**

**IFN-β1 mRNA**

**24 hr**

| experiment                           | ctl | nDNA       | mtDNA       | mock | DENV        |
|--------------------------------------|-----|------------|-------------|------|-------------|
| 1                                    | 1   | 0.972655   | 2.329467    | 1    | 23.6702     |
| 2                                    | 1   | 2          | 3.193194    | 1    | 68.5935     |
| 3                                    | 1   | 2.34567    | 5.598343    | 1    | 58.89201    |
| 4                                    | 1   | 1.613284   | 9.747282    | 1    | 94.02679    |
| 5                                    | 1   | 2.496661   | 10.51954    | 1    | 117.3765    |
| AVG.                                 | 1   | 1.885654   | 6.2775652   | 1    | 72.5118     |
| SEM                                  | 0   | 0.27438767 | 1.667265017 | 0    | 15.90925791 |
| Student's T test (v.s. mock or nDNA) |     |            | 0.0317      |      | 0.002       |

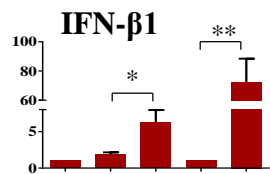

**IFN-λ1 mRNA**

**24 hr**

| experiment                           | ctl | nDNA        | mtDNA       | mock | DENV        |
|--------------------------------------|-----|-------------|-------------|------|-------------|
| 1                                    | 1   | 1.060688    | 2.411616    | 1    | 661.6846    |
| 2                                    | 1   | 1.681793    | 3.260289    | 1    | 952.1203    |
| 3                                    | 1   | 1.753211    | 9.317869    | 1    | 1101.306    |
| 4                                    | 1   | 2.242332    | 9.000468    | 1    | 673.2507    |
| 5                                    | 1   | 1.630145    | 7.594737    | 1    | 814.6294    |
| AVG.                                 | 1   | 1.6736338   | 6.3169958   | 1    | 840.5982    |
| SEM                                  | 0   | 0.188070542 | 1.456611366 | 0    | 83.99267122 |
| Student's T test (v.s. mock or nDNA) |     |             | 0.0134      |      | < 0.0001    |

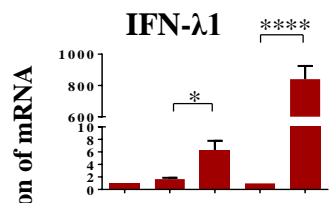

**IFN-λ2 mRNA**

**24 hr**

| experiment                           | ctl | nDNA        | mtDNA       | mock | DENV        |
|--------------------------------------|-----|-------------|-------------|------|-------------|
| 1                                    | 1   | 0.626332    | 2.989698    | 1    | 17.14838    |
| 2                                    | 1   | 1.101905    | 2.226843    | 1    | 13.13187    |
| 3                                    | 1   | 1.235419    | 2.639016    | 1    | 18.31559    |
| AVG.                                 | 1   | 0.987885333 | 2.618519    | 1    | 16.19861333 |
| SEM                                  | 0   | 0.184839666 | 0.220455614 | 0    | 1.569955498 |
| Student's T test (v.s. mock or nDNA) |     |             | 0.0048      |      | 0.0006      |

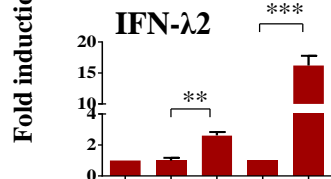

**IFN-λ3 mRNA**

**24 hr**

| experiment                           | ctl | nDNA        | mtDNA       | mock | DENV        |
|--------------------------------------|-----|-------------|-------------|------|-------------|
| 1                                    | 1   | 0.989657    | 1.840375    | 1    | 4.198867    |
| 2                                    | 1   | 0.626332    | 1.489677    | 1    | 5.502167    |
| 3                                    | 1   | 0.773782    | 1.802501    | 1    | 16.39291    |
| 4                                    | 1   | 0.773782    | 2.522755    | 1    | 27.56948    |
| AVG.                                 | 1   | 0.79088825  | 1.913827    | 1    | 13.415856   |
| SEM                                  | 0   | 0.074818126 | 0.217655157 | 0    | 5.452578004 |
| Student's T test (v.s. mock or nDNA) |     |             | 0.0028      |      | 0.0358      |

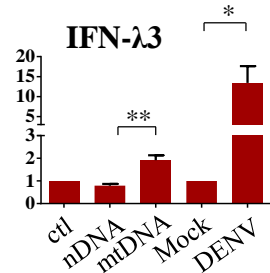

**B**

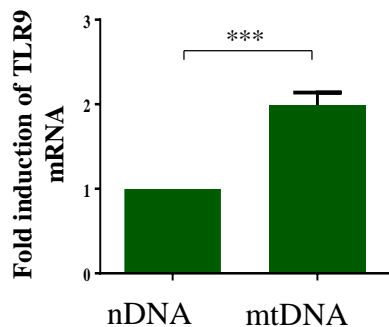

**TLR9 mRNA**

**24 hr**

| experiment                   | nDNA | mtDNA       |
|------------------------------|------|-------------|
| 1                            | 1    | 2.297397    |
| 2                            | 1    | 1.735077    |
| 3                            | 1    | 2.386671    |
| 4                            | 1    | 1.681793    |
| 5                            | 1    | 1.85961     |
| AVG.                         | 1    | 1.9921096   |
| SEM                          | 0    | 0.146423596 |
| Student's T test (v.s. nDNA) |      | 0.0001      |

C

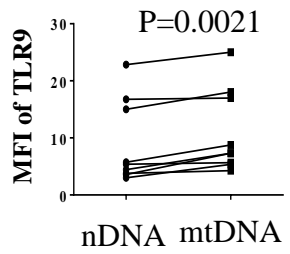

TLR9 MIF

24 hr

| experiment                           | nDNA        | mtDNA       |
|--------------------------------------|-------------|-------------|
| 1                                    | 3.8         | 4.26        |
| 2                                    | 22.84       | 25          |
| 3                                    | 16.76       | 16.99       |
| 4                                    | 15.02       | 18.03       |
| 5                                    | 3.6         | 7.32        |
| 6                                    | 4.45        | 7.32        |
| 7                                    | 5.39        | 5.65        |
| 8                                    | 5.73        | 8.75        |
| 9                                    | 3.02        | 5.36        |
| AVG.                                 | 8.956666667 | 10.96444444 |
| SEM                                  | 2.427775044 | 2.413206207 |
| Student's T test p value (v.s. nDNA) |             | 0.0021      |

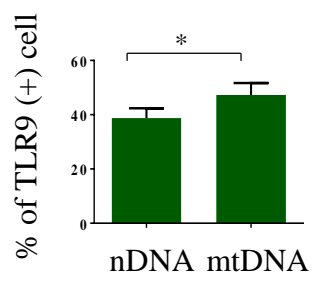

TLR9 (+) %

24 hr

| experiment                           | nDNA        | mtDNA       |
|--------------------------------------|-------------|-------------|
| 1                                    | 44.75       | 59.2        |
| 2                                    | 32.34       | 41.39       |
| 3                                    | 45.25       | 48.44       |
| 4                                    | 32.73       | 40.1        |
| 5                                    | 3.02        | 5.36        |
| AVG.                                 | 31.618      | 38.898      |
| SEM                                  | 7.674256576 | 9.043432092 |
| Student's T test p value (v.s. nDNA) |             | 0.0354      |

D

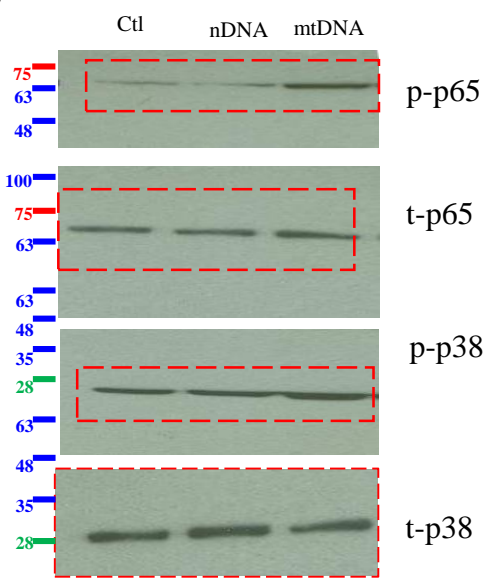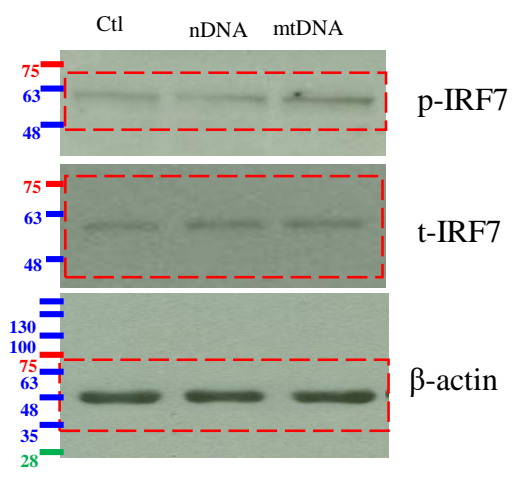

D

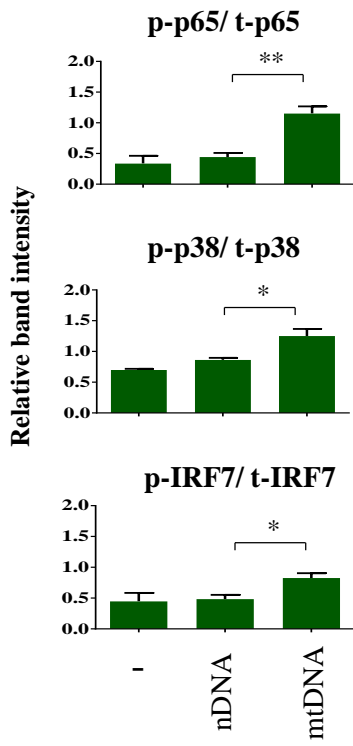

**p-p65/ t-p65**

| experiment       | 24 hr               |          |          |
|------------------|---------------------|----------|----------|
|                  | ctl                 | nDNA     | mtDNA    |
| 1                | 0.33157             | 0.323753 | 1.334279 |
| 2                | 0.557399            | 0.551537 | 1.182684 |
| 3                | 0.126129            | 0.452912 | 0.944141 |
| AVG.             | 0.338366            | 0.442734 | 1.153701 |
| SEM              | 0.124543            | 0.065952 | 0.113552 |
| Student's T test | p value (v.s. nDNA) | 0.5001   | 0.0056   |

**p-p38/ t-p38**

| experiment       | 24 hr               |          |          |
|------------------|---------------------|----------|----------|
|                  | ctl                 | nDNA     | mtDNA    |
| 1                | 0.72877             | 0.846086 | 1.480107 |
| 2                | 0.702987            | 0.820977 | 1.151871 |
| 3                | 0.664182            | 0.926875 | 1.119095 |
| AVG.             | 0.698646            | 0.864646 | 1.250358 |
| SEM              | 0.018771            | 0.031948 | 0.115264 |
| Student's T test | p value (v.s. nDNA) | 0.011    | 0.0321   |

**p-IRF7/ t-IRF7**

| experiment       | 24 hr               |          |          |
|------------------|---------------------|----------|----------|
|                  | ctl                 | nDNA     | mtDNA    |
| 1                | 0.424571            | 0.395525 | 0.676327 |
| 2                | 0.693605            | 0.619225 | 0.94509  |
| 3                | 0.230296            | 0.436971 | 0.856245 |
| AVG.             | 0.449491            | 0.483907 | 0.825887 |
| SEM              | 0.134325            | 0.068709 | 0.079056 |
| Student's T test | p value (v.s. nDNA) | 0.8307   | 0.0309   |

E

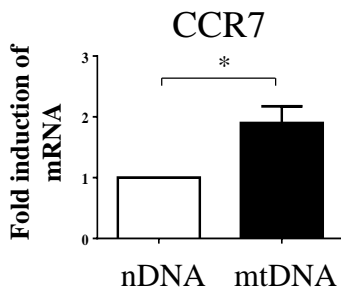

**CCR7 mRNA**

| experiment       | 24 hr               |             |
|------------------|---------------------|-------------|
|                  | nDNA                | mtDNA       |
| 1                | 1                   | 1.723092    |
| 2                | 1                   | 2.648178    |
| 3                | 1                   | 2.436821    |
| 4                | 1                   | 1.22264     |
| 5                | 1                   | 1.45902     |
| AVG.             | 1                   | 1.8979502   |
| SEM              | 0                   | 0.276812434 |
| Student's T test | p value (v.s. nDNA) | 0.0118      |

F

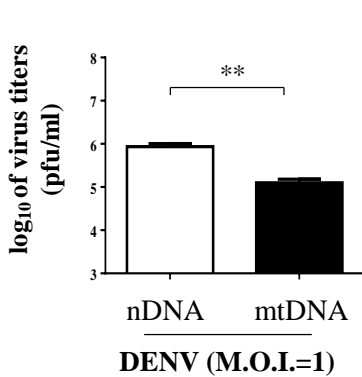

**Virus titer**

| experiment       | 24 hr               |             |
|------------------|---------------------|-------------|
|                  | nDNA                | mtDNA       |
| 1                | 5.880776            | 5.010595    |
| 2                | 6.076907            | 5.260896    |
| 3                | 5.845098            | 5.020696    |
| AVG.             | 5.934260333         | 5.097395667 |
| SEM              | 0.072063129         | 0.081802153 |
| Student's T test | p value (v.s. nDNA) | 0.0015      |

G

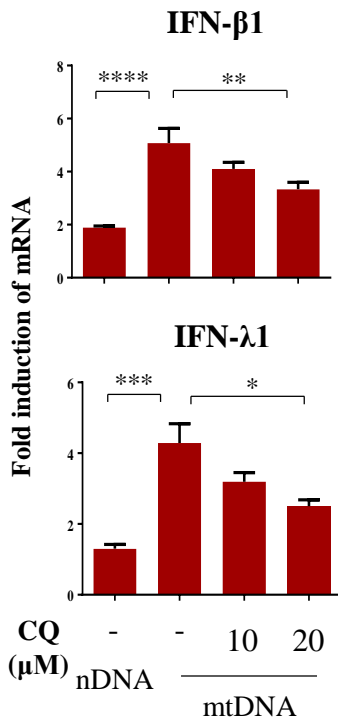

**IFN-β1 mRNA**

| experiment                                | 24 hr       |             |             |             |
|-------------------------------------------|-------------|-------------|-------------|-------------|
|                                           | nDNA        | mtDNA       | mtDNA CQ 10 | mtDNA CQ 20 |
| 1                                         | 1.905276    | 3.567714    | 3.39874     | 2.648178    |
| 2                                         | 2.013911    | 6.19026     | 4.469149    | 3.506423    |
| 3                                         | 1.777685    | 5.464161    | 4.438278    | 3.863745    |
| <b>AVG.</b>                               | 1.898957333 | 5.074045    | 4.102055667 | 3.339448667 |
| <b>SEM</b>                                | 0.068265718 | 0.781788495 | 0.351770735 | 0.360698907 |
| <b>One way ANOVA p value (v.s. mtDNA)</b> | < 0.0001    |             | 0.1774      | 0.0088      |

**IFN-λ1 mRNA**

| experiment                                | 24 hr       |             |             |             |
|-------------------------------------------|-------------|-------------|-------------|-------------|
|                                           | nDNA        | mtDNA       | mtDNA CQ 10 | mtDNA CQ 20 |
| 1                                         | 1.301342    | 4.453686    | 3.458149    | 2.818642    |
| 2                                         | 1.510473    | 5.133704    | 3.446185    | 2.488023    |
| 3                                         | 1.094294    | 3.271608    | 2.666597    | 2.196186    |
| <b>AVG.</b>                               | 1.302036333 | 4.286332667 | 3.190310333 | 2.500950333 |
| <b>SEM</b>                                | 0.12014103  | 0.544014624 | 0.261879442 | 0.179803787 |
| <b>One way ANOVA p value (v.s. mtDNA)</b> | 0.0005      |             | 0.1262      | 0.0129      |

H

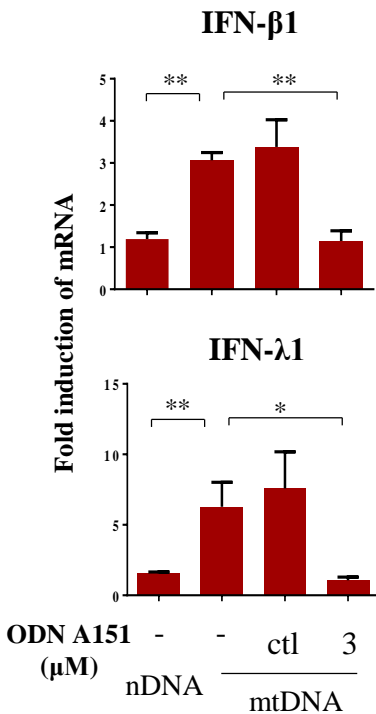

**IFN-β1 mRNA**

| experiment                                   | 24 hr       |             |             |                  |
|----------------------------------------------|-------------|-------------|-------------|------------------|
|                                              | nDNA        | mtDNA       | mtDNA ctl   | mtDNA ODN A151 3 |
| 1                                            | 1.399586    | 2.741566    | 2.34567     | 0.668964         |
| 2                                            | 1.278986    | 3.07375     | 3.237769    | 1.342573         |
| 3                                            | 0.907519    | 3.375263    | 4.563055    | 1.433955         |
| <b>AVG.</b>                                  | 1.195363667 | 3.063526333 | 3.382164667 | 1.148497333      |
| <b>SEM</b>                                   | 0.148073185 | 0.183003975 | 0.644162671 | 0.241213481      |
| <b>Student's T test p value (v.s. mtDNA)</b> | 0.0014      |             | 0.6590      | 0.0032           |

**IFN-λ1 mRNA**

| experiment                                   | 24 hr       |             |             |                  |
|----------------------------------------------|-------------|-------------|-------------|------------------|
|                                              | nDNA        | mtDNA       | mtDNA ctl   | mtDNA ODN A151 3 |
| 1                                            | 1.717131    | 4.126733    | 4.547268    | 0.849685         |
| 2                                            | 1.558329    | 4.993322    | 5.407643    | 0.817902         |
| 3                                            | 1.448942    | 9.713559    | 12.77277    | 1.531558         |
| <b>AVG.</b>                                  | 1.574800667 | 6.277871333 | 7.575893667 | 1.066381667      |
| <b>SEM</b>                                   | 0.077856324 | 1.735963367 | 2.610281211 | 0.23276906       |
| <b>Student's T test p value (v.s. mtDNA)</b> | 0.004       |             | 0.7001      | 0.0353           |
