# Supplementary material
Source: PubMed Central journal article supplement (PMC6073071)
Supplement: EMBR-19-e46182-s009.pdf [file EMBR-19-e46182-s009.pdf]

A

## Cytosol/ total mtDNA

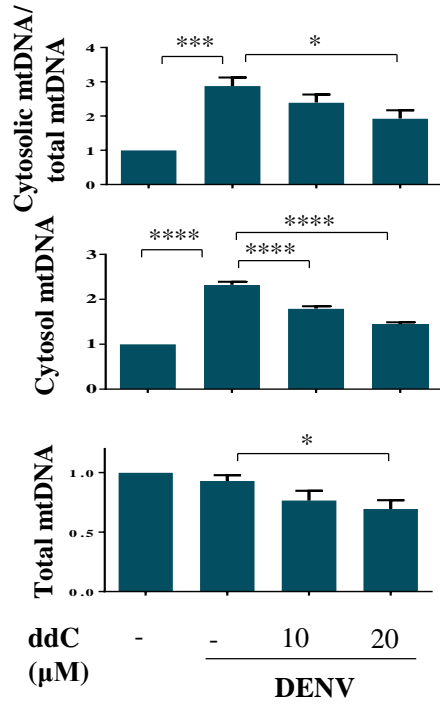

One way ANOVA

p value (v.s. mtDNA)

| experiment    | 24 hr |             |             |             |
|---------------|-------|-------------|-------------|-------------|
|               | mock  | DENV        | DENV ddC 10 | DENV ddC 20 |
| 1             | 1     | 3.470407    | 1.74164     | 1.460917    |
| 2             | 1     | 2.74927     | 2.434671    | 1.950445    |
| 3             | 1     | 3.008433    | 2.83185     | 2.580205    |
| 4             | 1     | 2.268412    | 2.571496    | 1.723925    |
| AVG.          | 1     | 2.8741305   | 2.39491425  | 1.928873    |
| SEM           | 0     | 0.251009275 | 0.232816417 | 0.239040657 |
| One way ANOVA |       | 0.0001      | 0.3916      | 0.0228      |

## Cytosol mtDNA

One way ANOVA

p value (v.s. mtDNA)

| experiment    | 24 hr |             |             |             |
|---------------|-------|-------------|-------------|-------------|
|               | mock  | DENV        | DENV ddC 10 | DENV ddC 20 |
| 1             | 1     | 2.419988    | 1.82134     | 1.453973    |
| 2             | 1     | 2.273634    | 1.681793    | 1.361314    |
| 3             | 1     | 2.445281    | 1.931873    | 1.569168    |
| 4             | 1     | 2.158456    | 1.735077    | 1.385109    |
| AVG.          | 1     | 2.32433975  | 1.79252075  | 1.442391    |
| SEM           | 0     | 0.066997429 | 0.05462754  | 0.046602269 |
| One way ANOVA |       | < 0.0001    | < 0.0001    | < 0.0001    |

## total mtDNA

One way ANOVA

p value (v.s. mtDNA)

| experiment    | 24 hr |             |             |             |
|---------------|-------|-------------|-------------|-------------|
|               | mock  | DENV        | DENV ddC 10 | DENV ddC 20 |
| 1             | 1     | 0.983691    | 0.922391    | 0.819802    |
| 2             | 1     | 0.831242    | 0.720519    | 0.6961      |
| 3             | 1     | 0.970582    | 0.651123    | 0.565434    |
| AVG.          | 1     | 0.928505    | 0.764677667 | 0.693778667 |
| SEM           | 0     | 0.048778513 | 0.081361483 | 0.073438889 |
| One way ANOVA |       | > 0.9999    | 0.0724      | 0.0207      |

A

Fold of induction of mRNA

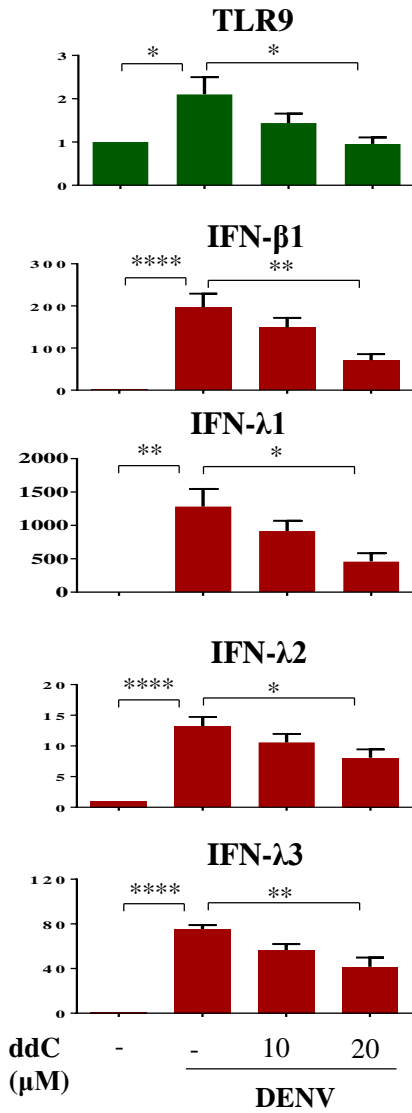**TLR9 mRNA**

|               |                     | 24 hr       |             |             |  |
|---------------|---------------------|-------------|-------------|-------------|--|
| experiment    | mock                | DENV        | DENV ddC 10 | DENV ddC 20 |  |
| 1             | 1                   | 2.540302    | 1.252664    | 0.795536    |  |
| 2             | 1                   | 1.310393    | 1.189207    | 0.817902    |  |
| 3             | 1                   | 2.457013    | 1.872655    | 1.257471    |  |
| AVG.          | 1                   | 2.102569333 | 1.438175333 | 0.956969667 |  |
| SEM           | 0                   | 0.396817242 | 0.218010805 | 0.150389326 |  |
| One way ANOVA | p value (v.s. DENV) | 0.0342      | 0.2532      | 0.0283      |  |

**INF-β1 mRNA**

|               |                     | 24 hr       |             |             |  |
|---------------|---------------------|-------------|-------------|-------------|--|
| experiment    | mock                | DENV        | DENV ddC 10 | DENV ddC 20 |  |
| 1             | 1                   | 284.0102    | 202.2224    | 50.90713    |  |
| 2             | 1                   | 188.0583    | 151.1709    | 57.08491    |  |
| 3             | 1                   | 188.0583    | 151.1709    | 114.1698    |  |
| 4             | 1                   | 126.2307    | 89.56854    | 62.46251    |  |
| AVG.          | 1                   | 196.589375  | 148.533185  | 71.1560875  |  |
| SEM           | 0                   | 32.58105568 | 23.04574481 | 14.53093272 |  |
| One way ANOVA | p value (v.s. DENV) | < 0.0001    | 0.4066      | 0.0039      |  |

**INF-λ1 mRNA**

|               |                     | 24 hr       |             |             |  |
|---------------|---------------------|-------------|-------------|-------------|--|
| experiment    | mock                | DENV        | DENV ddC 10 | DENV ddC 20 |  |
| 1             | 1                   | 1808.318    | 1218.114    | 254.3074    |  |
| 2             | 1                   | 1017.294    | 803.704     | 680.5331    |  |
| 3             | 1                   | 1023.541    | 723.7533    | 447.0686    |  |
| AVG.          | 1                   | 1283.051    | 915.1904333 | 460.6363667 |  |
| SEM           | 0                   | 262.6396912 | 153.2101433 | 123.227635  |  |
| One way ANOVA | p value (v.s. DENV) | 0.0017      | 0.4544      | 0.0227      |  |

**INF-λ2 mRNA**

|               |                     | 24 hr       |             |             |  |
|---------------|---------------------|-------------|-------------|-------------|--|
| experiment    | mock                | DENV        | DENV ddC 10 | DENV ddC 20 |  |
| 1             | 1                   | 14.82536    | 12.50986    | 10.06738    |  |
| 2             | 1                   | 14.66641    | 11.66995    | 9.089069    |  |
| 3             | 1                   | 14.66641    | 11.66995    | 9.089069    |  |
| 4             | 1                   | 8.571551    | 6.47183     | 4.048498    |  |
| AVG.          | 1                   | 13.18243275 | 10.5803975  | 8.073504    |  |
| SEM           | 0                   | 1.537417136 | 1.383757016 | 1.361340006 |  |
| One way ANOVA | p value (v.s. DENV) | < 0.0001    | 0.4892      | 0.0387      |  |

**INF-λ3 mRNA**

|               |                     | 24 hr       |             |             |  |
|---------------|---------------------|-------------|-------------|-------------|--|
| experiment    | mock                | DENV        | DENV ddC 10 | DENV ddC 20 |  |
| 1             | 1                   | 79.79572    | 65.97439    | 57.58857    |  |
| 2             | 1                   | 78.0762     | 47.0762     | 29.89694    |  |
| 3             | 1                   | 68.59181    | 56.4916     | 37.14164    |  |
| AVG.          | 1                   | 75.48791    | 56.51406333 | 41.54238333 |  |
| SEM           | 0                   | 3.483596497 | 5.455449104 | 8.291190092 |  |
| One way ANOVA | p value (v.s. DENV) | < 0.0001    | 0.1024      | 0.0055      |  |

**B**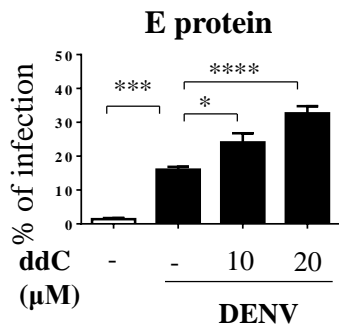**E protein flow cytometry**

One way ANOVA

p value (v.s. DENV)

**24 hr**

| experiment          | mock        | DENV       | DENV ddC 10 | DENV ddC 20 |
|---------------------|-------------|------------|-------------|-------------|
| 1                   | 0.83        | 16.86      | 28.65       | 36.09       |
| 2                   | 0.8         | 17.17      | 28.89       | 34.07       |
| 3                   | 1.94        | 13.52      | 18.64       | 34          |
| 4                   | 1.96        | 16.54      | 20.02       | 26.44       |
| AVG.                | 1.3825      | 16.0225    | 24.05       | 32.65       |
| SEM                 | 0.327728928 | 0.84402187 | 2.740051703 | 2.125962527 |
| p value (v.s. DENV) | 0.0003      |            | 0.0243      | <0.0001     |

**C**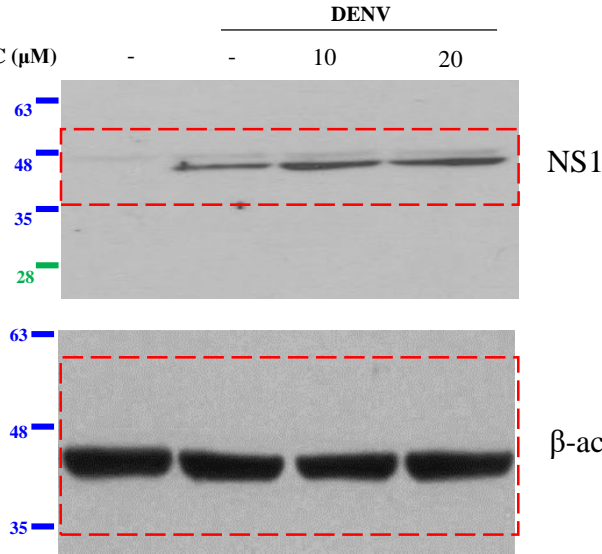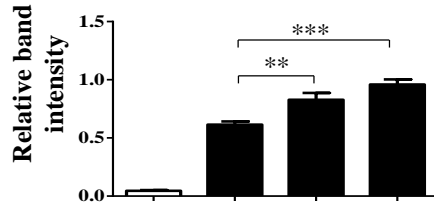

NS1/ β-actin

One way ANOVA

p value (v.s. DENV)

**24 hr**

| experiment          | mock        | DENV        | DENV ddC 10 | DENV ddC 20 |
|---------------------|-------------|-------------|-------------|-------------|
| 1                   | 0.047755    | 0.657215    | 0.828242    | 0.879962    |
| 2                   | 0.041586    | 0.562773    | 0.852924    | 0.91491     |
| 3                   | 0.061089    | 0.664763    | 0.675971    | 0.96102     |
| 4                   | 0.034344    | 0.57163     | 0.956987    | 1.081626    |
| AVG.                | 0.0461935   | 0.61409525  | 0.828531    | 0.9593795   |
| SEM                 | 0.005671228 | 0.027178123 | 0.058001867 | 0.043999596 |
| p value (v.s. DENV) | <0.0001     |             | 0.0064      | 0.0001      |

**D**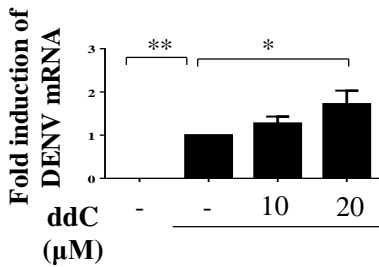**DENV mRNA**

One way ANOVA

p value (v.s. DENV)

**24 hr**

| experiment          | mock        | DENV        | DENV ddC 10 | DENV ddC 20 |
|---------------------|-------------|-------------|-------------|-------------|
| 1                   | 1.44E-06    | 0.996381    | 1.152503    | 1.574365    |
| 2                   | 0.0000141   | 1.004287    | 1.095183    | 1.391048    |
| 3                   | 0.0000074   | 1.003592    | 1.098224    | 1.279138    |
| 4                   | 2.69E-06    | 0.99574     | 1.745743    | 2.636897    |
| AVG.                | 6.4075E-06  | 1           | 1.27291325  | 1.720362    |
| SEM                 | 2.86728E-06 | 0.002282645 | 0.158158933 | 0.311512153 |
| p value (v.s. DENV) | 0.0048      |             | 0.8728      | 0.0388      |

**E**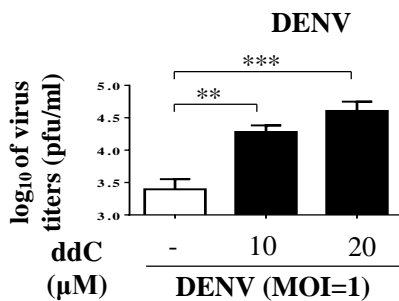**Virus titer**

One way ANOVA

p value (v.s. DENV)

**24 hr**

| experiment          | DENV        | DENV ddC 10 | DENV ddC 20 |
|---------------------|-------------|-------------|-------------|
| 1                   | 2.954243    | 4.041393    | 4.267172    |
| 2                   | 3.60206     | 4.491362    | 4.973128    |
| 3                   | 3.40654     | 4.39794     | 4.562293    |
| 4                   | 3.623249    | 4.190332    | 4.618048    |
| AVG.                | 3.396523    | 4.28025675  | 4.60516025  |
| SEM                 | 0.155285242 | 0.101471312 | 0.144810226 |
| p value (v.s. DENV) |             | 0.0026      | 0.0003      |

F

Fold induction of mRNA

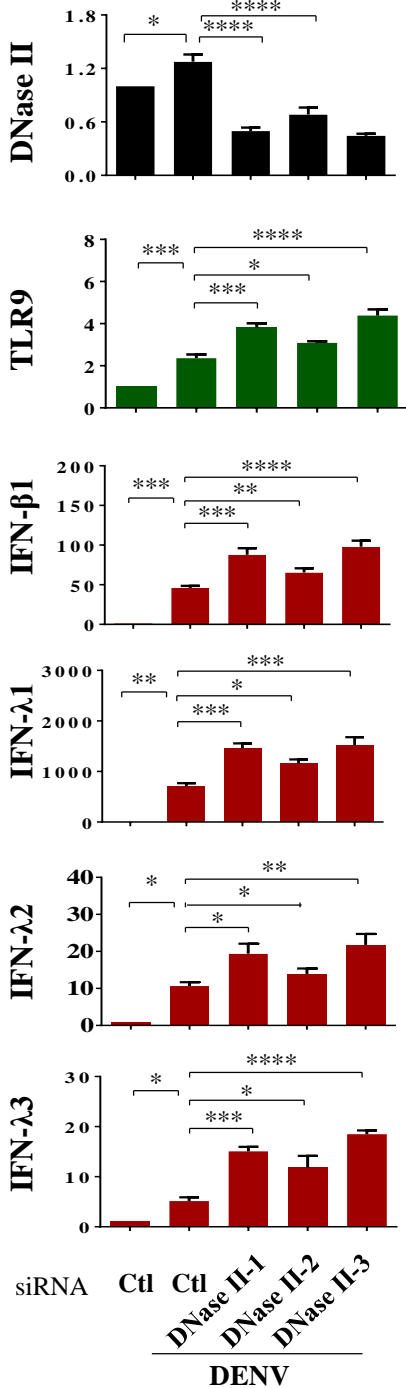

**Dnaase II mRNA**

| experiment                | 24 hr      |             |                    |                    |                    |
|---------------------------|------------|-------------|--------------------|--------------------|--------------------|
|                           | Mock siCtl | DENV siCtl  | DENV siDnaase II-1 | DENV siDnaase II-2 | DENV siDnaase II-3 |
| 1                         | 1          | 1.21841     | 0.410371           | 0.532185           | 0.397768           |
| 2                         | 1          | 1.140764    | 0.526681           | 0.624165           | 0.45219            |
| 3                         | 1          | 1.235419    | 0.456916           | 0.680657           | 0.418994           |
| 4                         | 1          | 1.510473    | 0.592546           | 0.898132           | 0.505226           |
| AVG.                      | 1          | 1.2762665   | 0.4966285          | 0.68378475         | 0.4435445          |
| SEM                       | 0          | 0.080741101 | 0.039917371        | 0.077723616        | 0.023412189        |
| One way ANOVA (v.s. DENV) | p value    | 0.0104      | < 0.0001           | < 0.0001           | < 0.0001           |

**TLR9 mRNA**

| experiment                | 24 hr      |             |                    |                    |                    |
|---------------------------|------------|-------------|--------------------|--------------------|--------------------|
|                           | Mock siCtl | DENV siCtl  | DENV siDnaase II-1 | DENV siDnaase II-2 | DENV siDnaase II-3 |
| 1                         | 1          | 2.143547    | 3.375263           | 2.958775           | 4.098227           |
| 2                         | 1          | 2.770219    | 3.605002           | 3.063116           | 3.931282           |
| 3                         | 1          | 2.020903    | 3.97237            | 3.271608           | 4.287094           |
| 4                         | 1          | 2.531513    | 4.301978           | 3.105876           | 5.223439           |
| AVG.                      | 1          | 2.3665455   | 3.81365325         | 3.09984375         | 4.3850105          |
| SEM                       | 0          | 0.173051928 | 0.203996206        | 0.065056812        | 0.288771005        |
| One way ANOVA (v.s. DENV) | p value    | 0.0003      | 0.0002             | 0.0434             | < 0.0001           |

**IFN-β1 mRNA**

| experiment                | 24 hr      |             |                    |                    |                    |
|---------------------------|------------|-------------|--------------------|--------------------|--------------------|
|                           | Mock siCtl | DENV siCtl  | DENV siDnaase II-1 | DENV siDnaase II-2 | DENV siDnaase II-3 |
| 1                         | 1          | 46.52712    | 105.4197           | 66.48698           | 109.1373           |
| 2                         | 1          | 40.64483    | 72.00374           | 52.70983           | 84.44851           |
| 3                         | 1          | 52.89282    | 98.36001           | 78.52064           | 112.986            |
| 4                         | 1          | 43.41134    | 75.32203           | 64                 | 85.33112           |
| AVG.                      | 1          | 45.8690275  | 87.77637           | 65.4293625         | 97.9757325         |
| SEM                       | 0          | 2.631527031 | 8.302544646        | 5.294098015        | 7.598029862        |
| One way ANOVA (v.s. DENV) | p value    | 0.0002      | 0.0004             | 0.0058             | < 0.0001           |

**IFN-λ1 mRNA**

| experiment                | 24 hr      |            |                    |                    |                    |
|---------------------------|------------|------------|--------------------|--------------------|--------------------|
|                           | Mock siCtl | DENV siCtl | DENV siDnaase II-1 | DENV siDnaase II-2 | DENV siDnaase II-3 |
| 1                         | 1          | 661.6846   | 1341.8430          | 1016.9270          | 1327.9640          |
| 2                         | 1          | 831.7465   | 1646.2870          | 1273.8680          | 1833.0110          |
| 3                         | 1          | 617.3736   | 1398.825           | 1196.8280          | 1403.6820          |
| AVG.                      | 1          | 703.6016   | 1462.318           | 1162.541           | 1521.552           |
| SEM                       | 0          | 65.33684   | 93.44355           | 76.12789           | 157.2558           |
| One way ANOVA (v.s. DENV) | p value    | 0.0013     | 0.0007             | 0.0238             | 0.0004             |

**IFN-λ2 mRNA**

| experiment                | 24 hr      |             |                    |                    |                    |
|---------------------------|------------|-------------|--------------------|--------------------|--------------------|
|                           | Mock siCtl | DENV siCtl  | DENV siDnaase II-1 | DENV siDnaase II-2 | DENV siDnaase II-3 |
| 1                         | 1          | 9.513657    | 21.70567           | 12.72858           | 24.76104           |
| 2                         | 1          | 8.544523    | 12.59693           | 10.48315           | 13.13187           |
| 3                         | 1          | 13.08643    | 25.19386           | 17.14838           | 26.44641           |
| 4                         | 1          | 11.51147    | 18.06343           | 15.29513           | 22.62742           |
| AVG.                      | 1          | 10.66402    | 19.3899725         | 13.91381           | 21.741685          |
| SEM                       | 0          | 1.016605638 | 2.691850455        | 1.459014685        | 2.974396056        |
| One way ANOVA (v.s. DENV) | p value    | 0.0134      | 0.0267             | 0.0125             | 0.0047             |

**IFN-λ3 mRNA**

| experiment                | 24 hr      |             |                    |                    |                    |
|---------------------------|------------|-------------|--------------------|--------------------|--------------------|
|                           | Mock siCtl | DENV siCtl  | DENV siDnaase II-1 | DENV siDnaase II-2 | DENV siDnaase II-3 |
| 1                         | 1          | 4.806544    | 16.22335           | 14.47007           | 17.87659           |
| 2                         | 1          | 6.588728    | 15.67072           | 13.8326            | 19.97329           |
| 3                         | 1          | 4.013887    | 13.31518           | 7.160201           | 17.63048           |
| AVG.                      | 1          | 5.136386333 | 15.06975           | 11.820957          | 18.49345333        |
| SEM                       | 0          | 0.761369056 | 0.891672005        | 2.337632482        | 0.743321365        |
| One way ANOVA (v.s. DENV) | p value    | 0.0148      | 0.0007             | 0.0121             | < 0.0001           |
