# Supplementary material
Source: PubMed Central journal article supplement (PMC6073071)

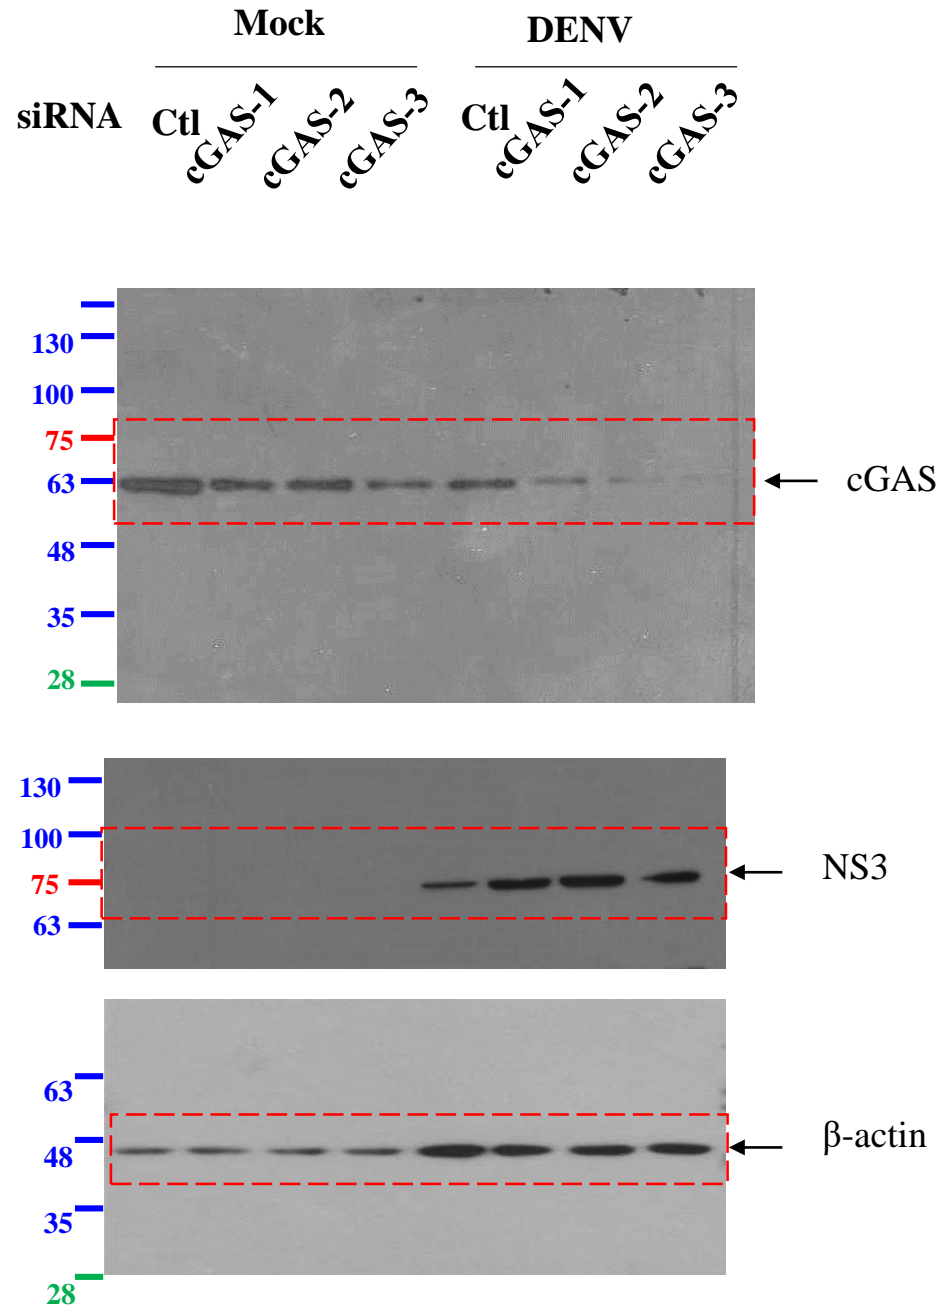

Supplement: EMBR-19-e46182-s011.pdf [file EMBR-19-e46182-s011.pdf]
